# Supplementary material
Source: PubMed Central journal article supplement (PMC7456333)

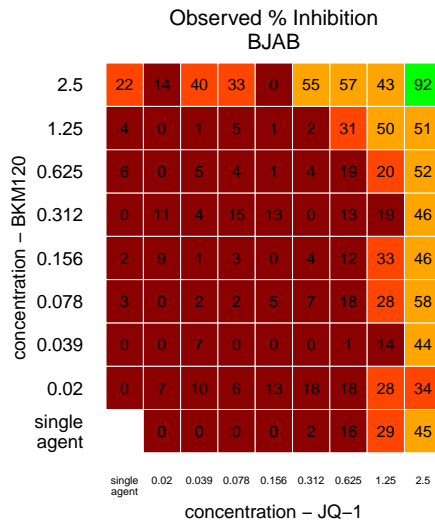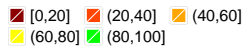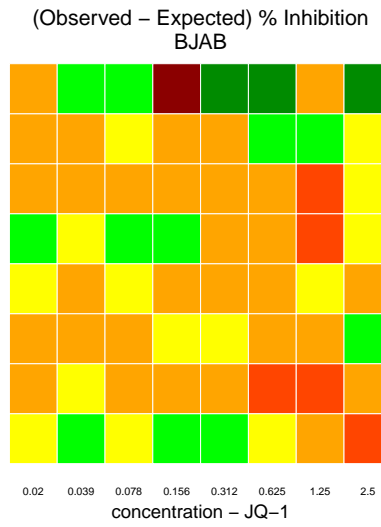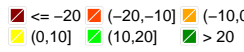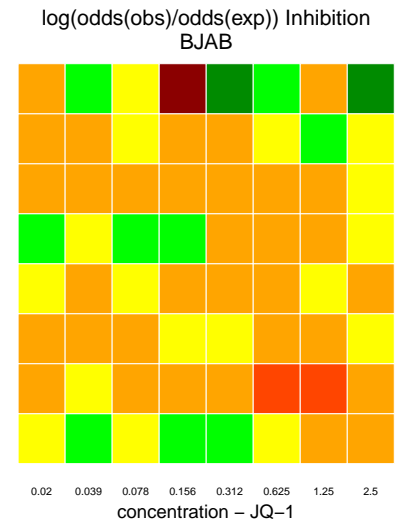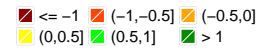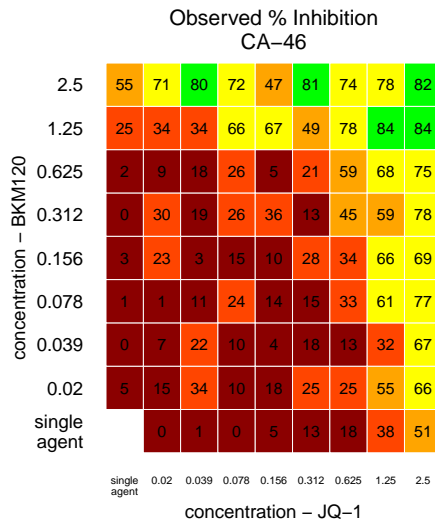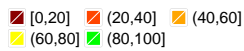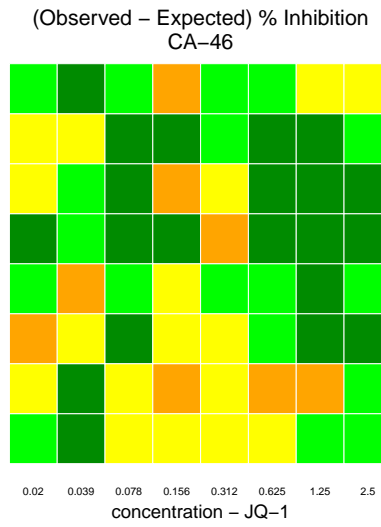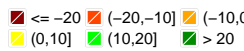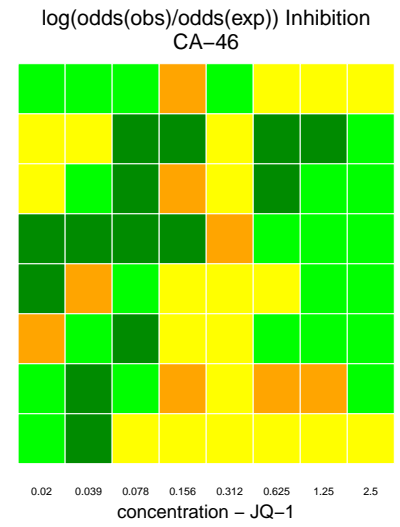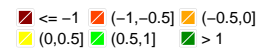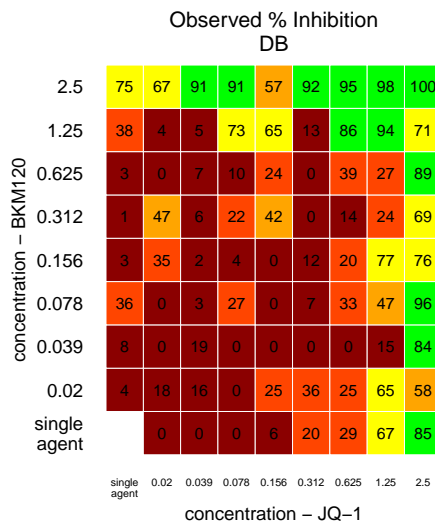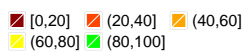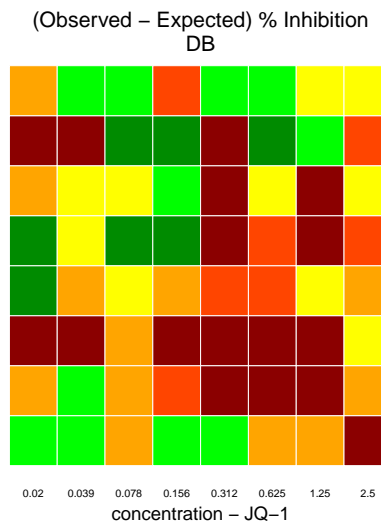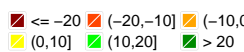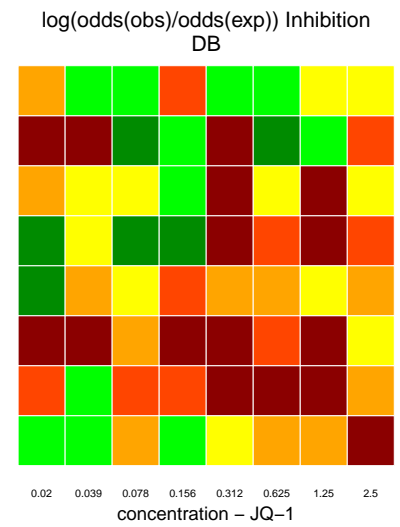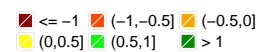

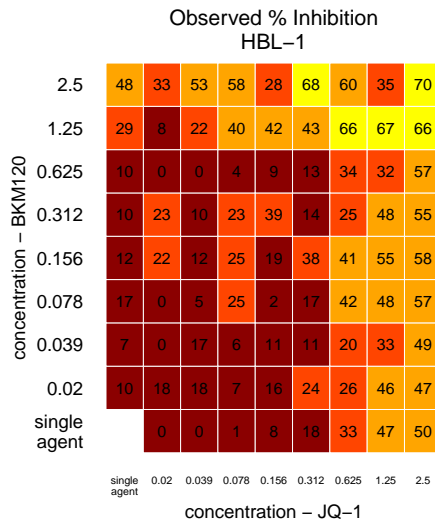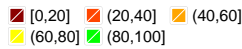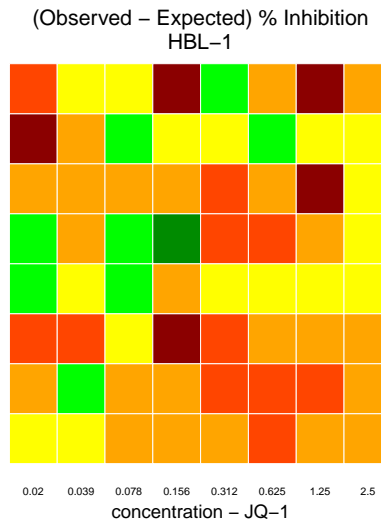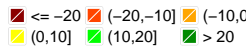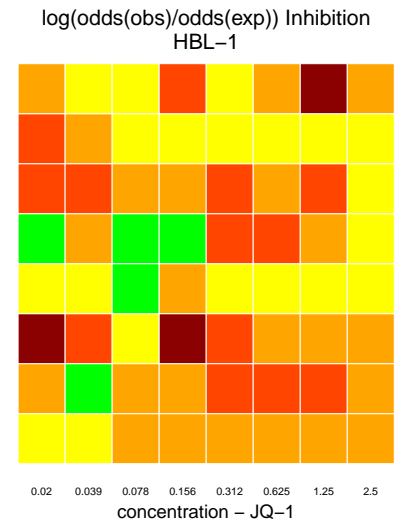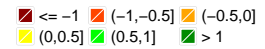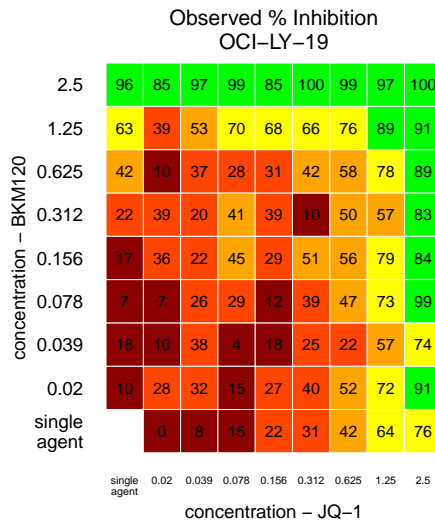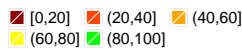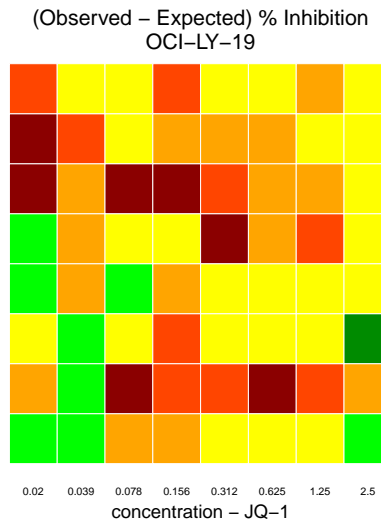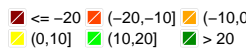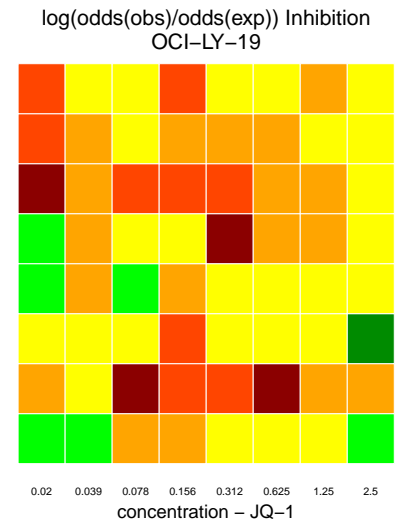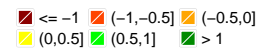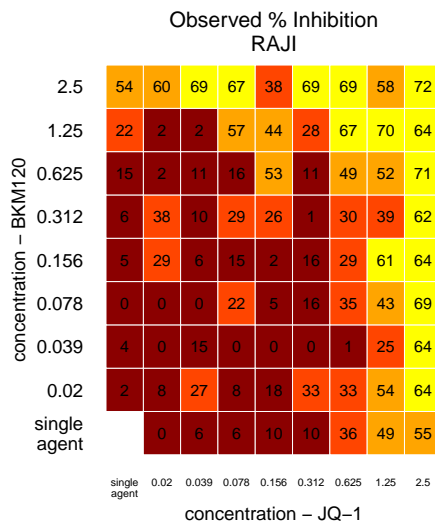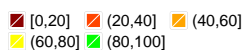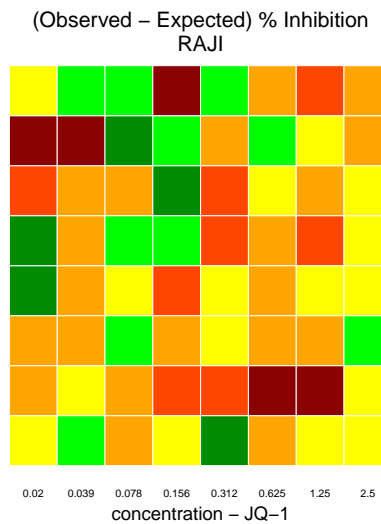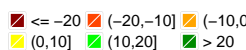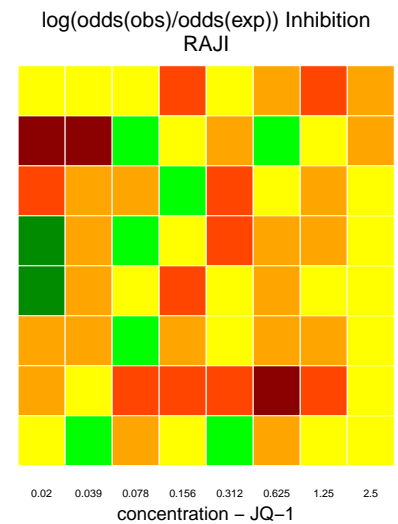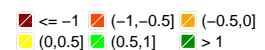

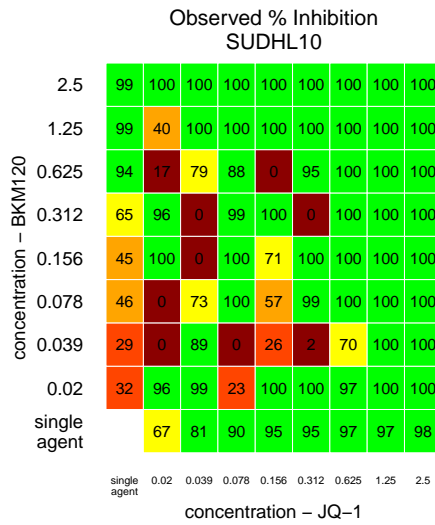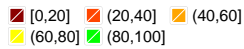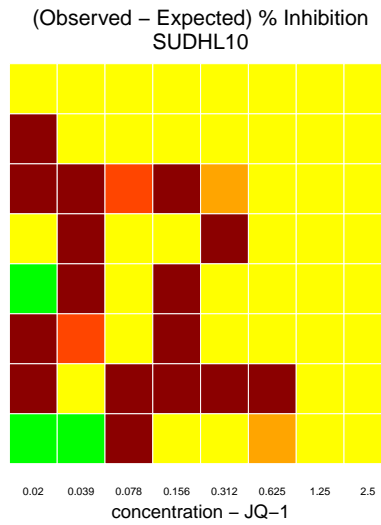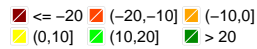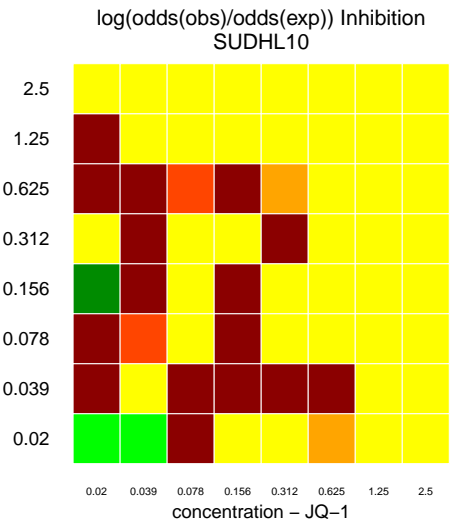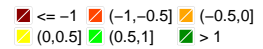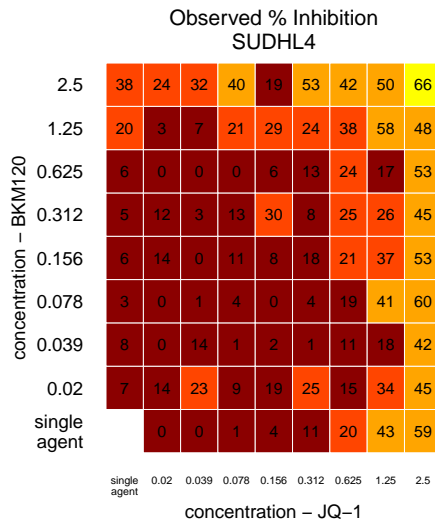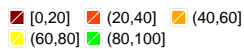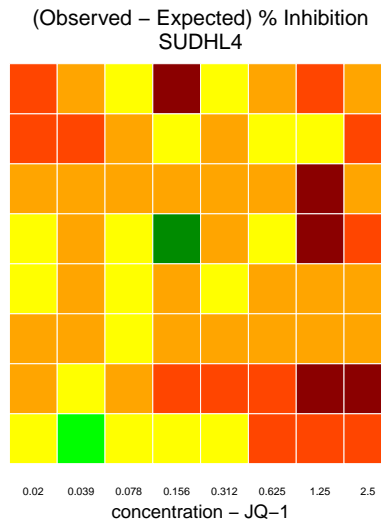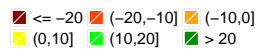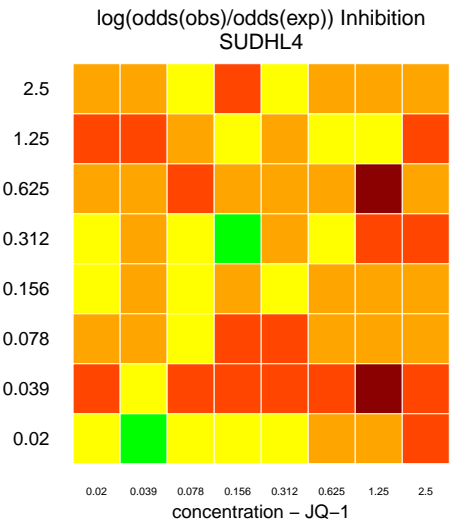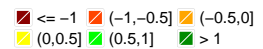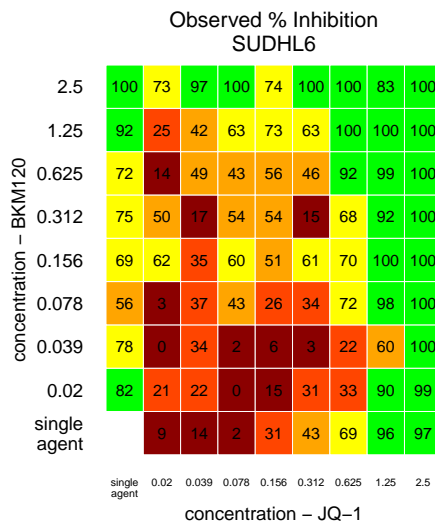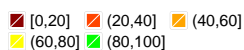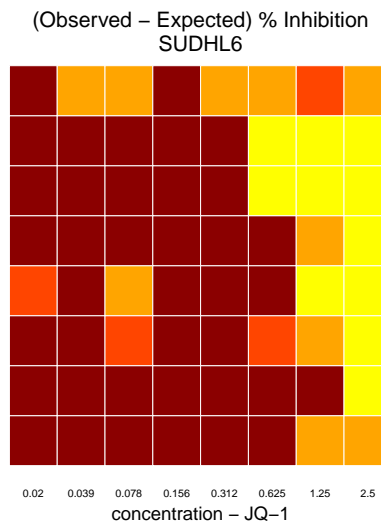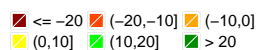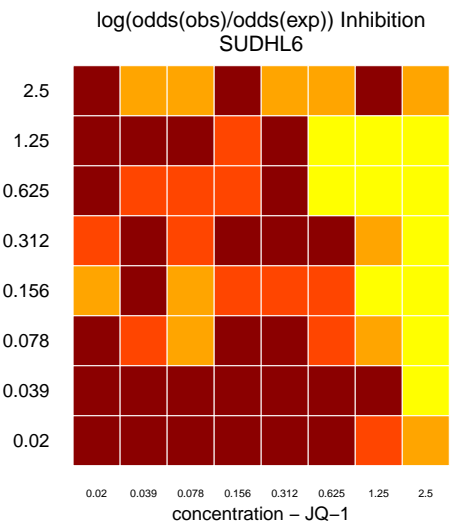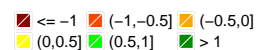

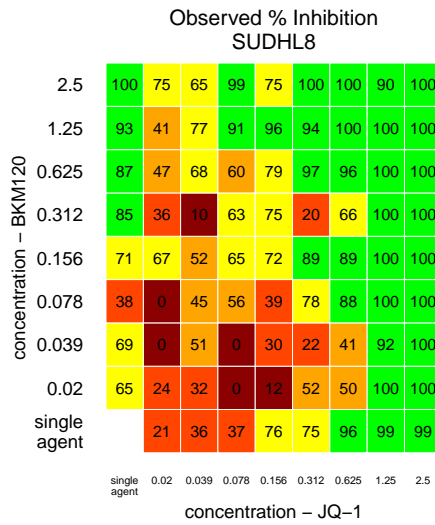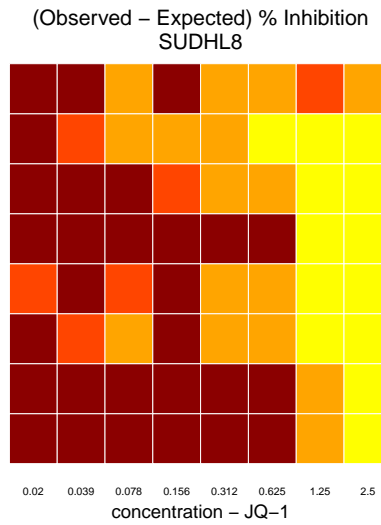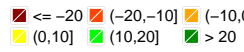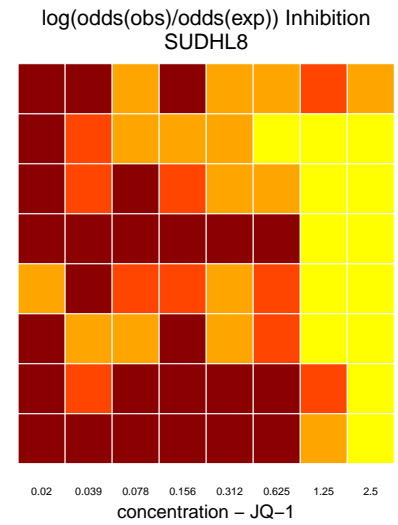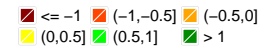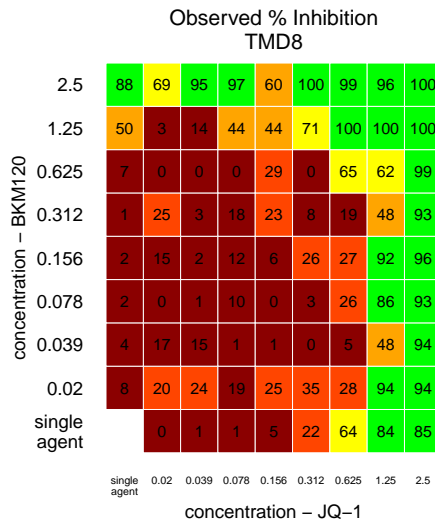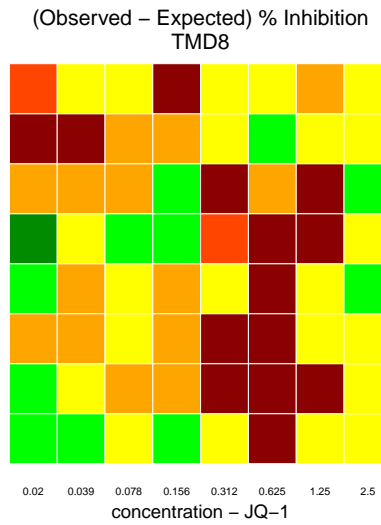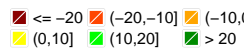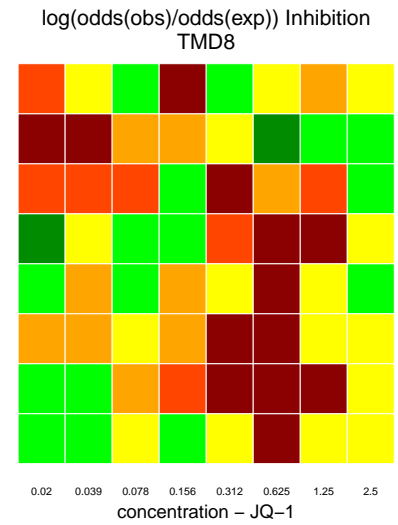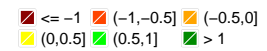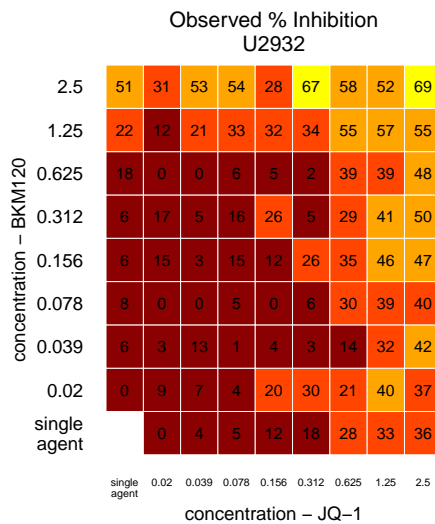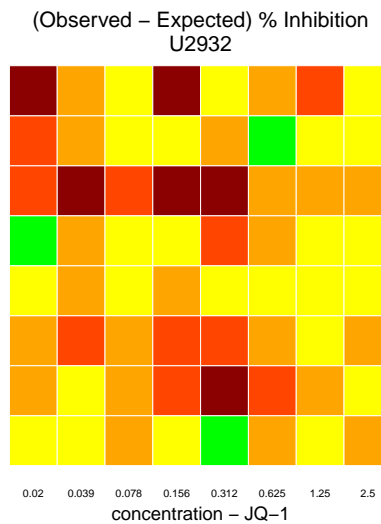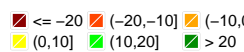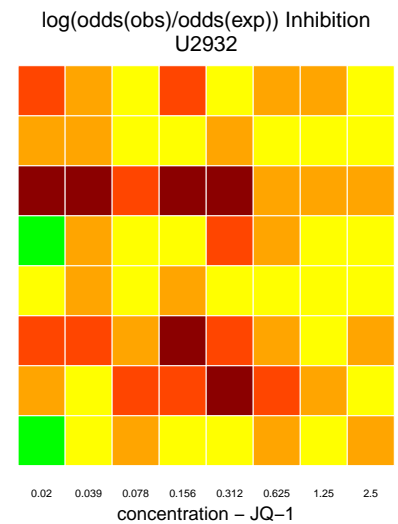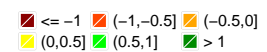

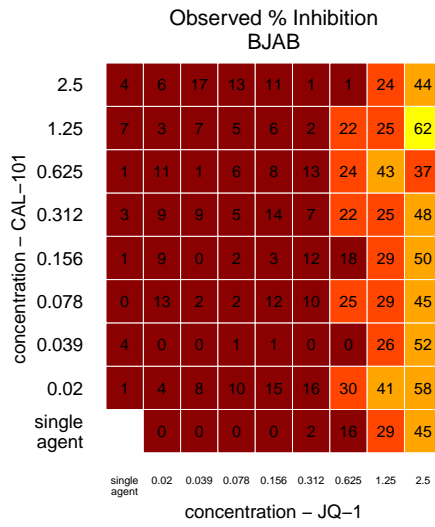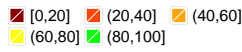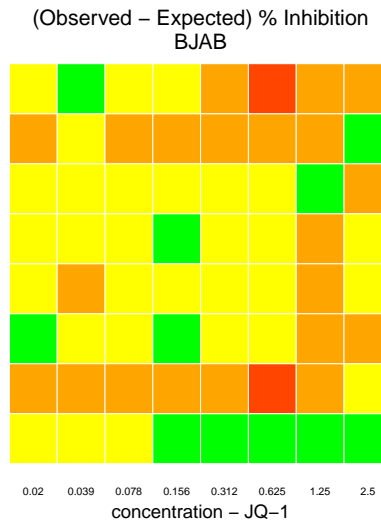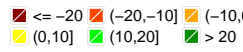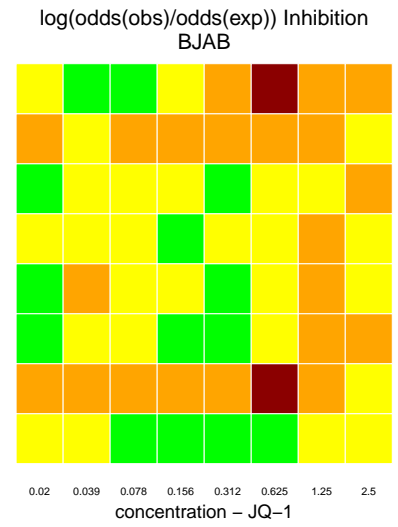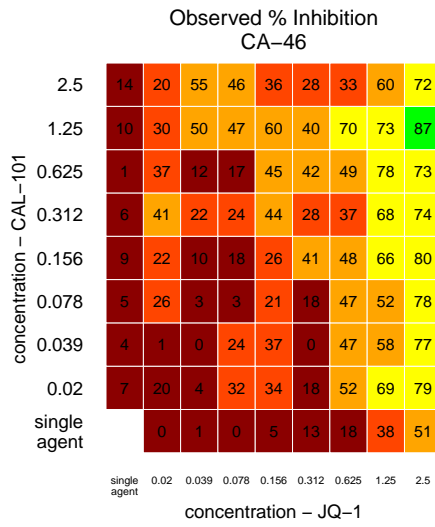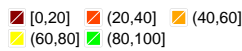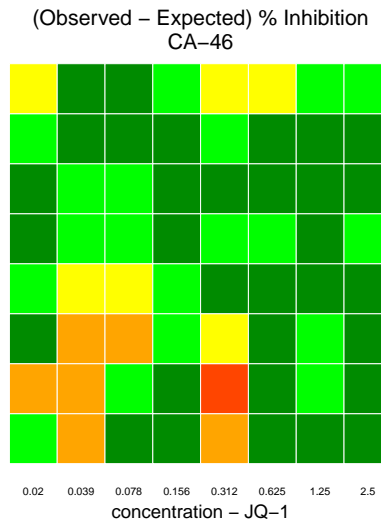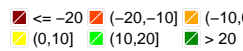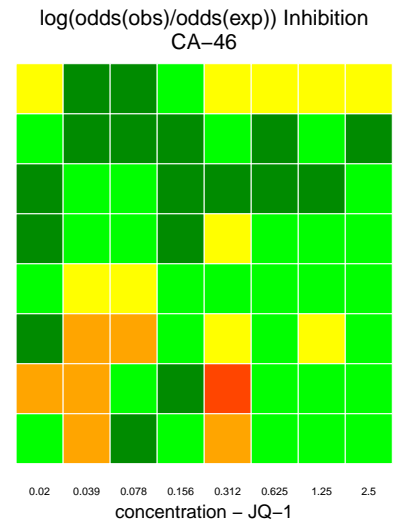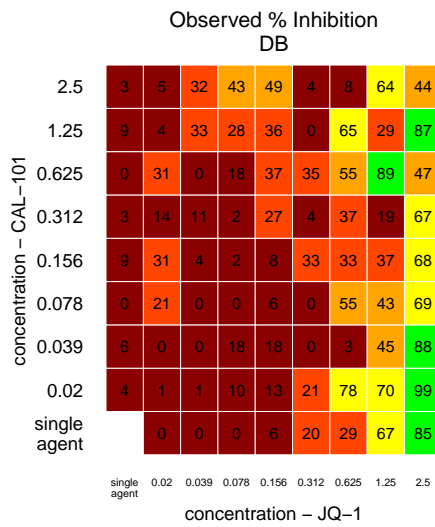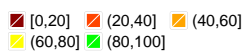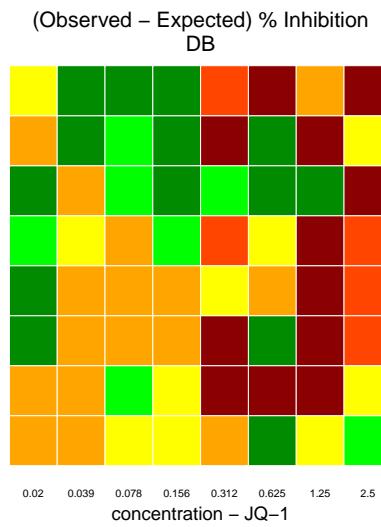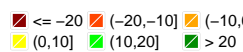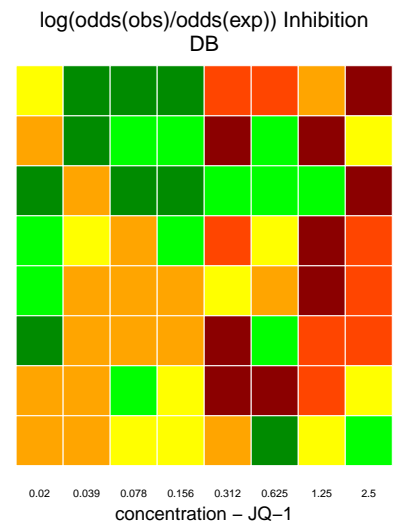

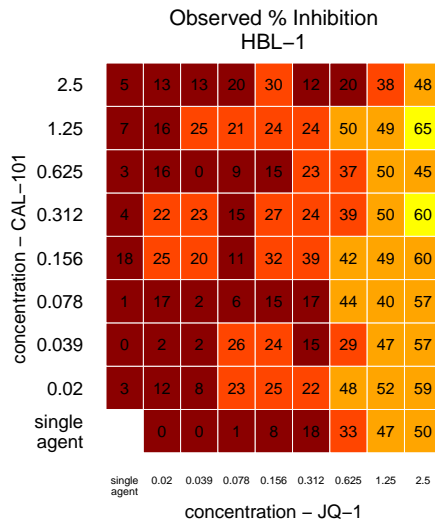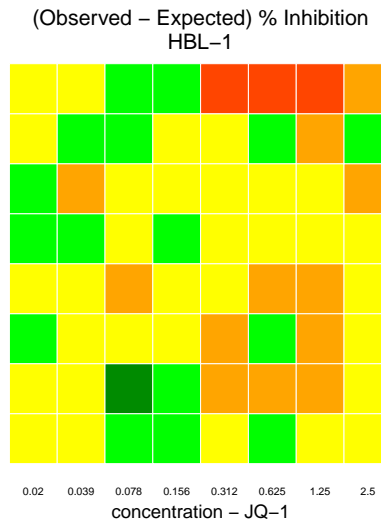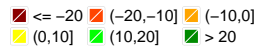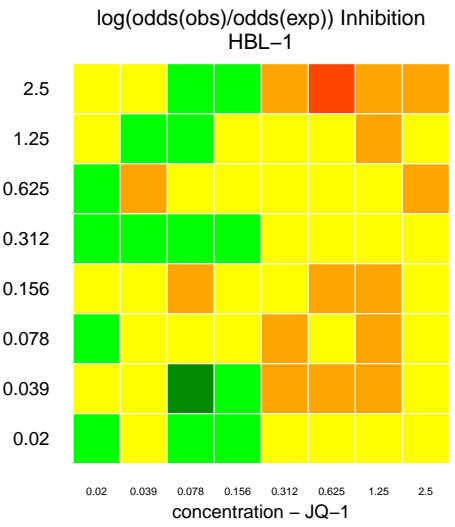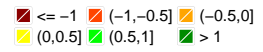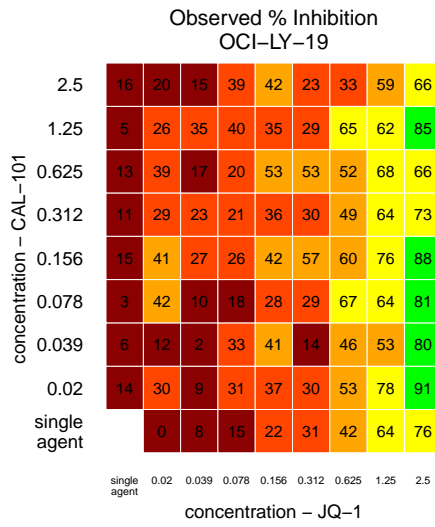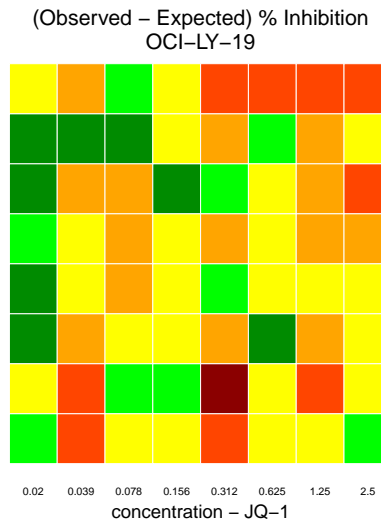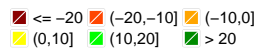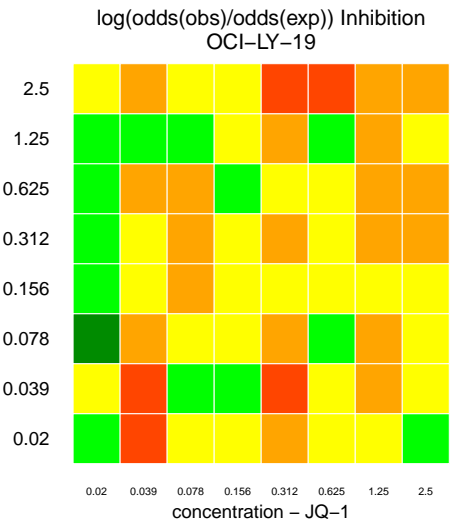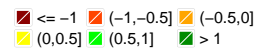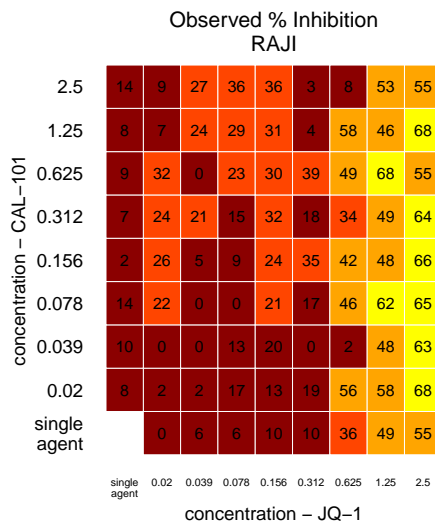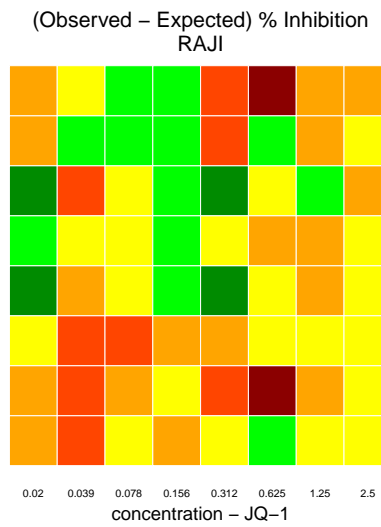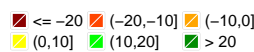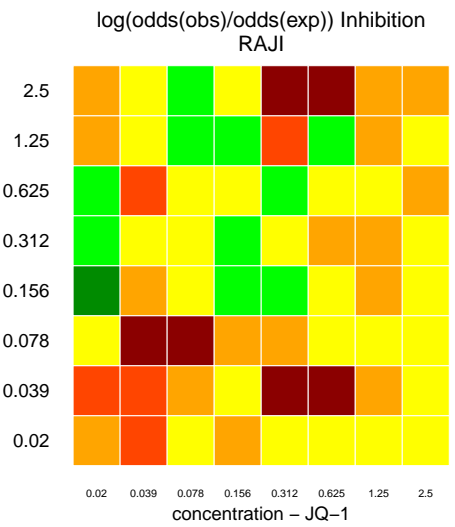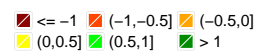

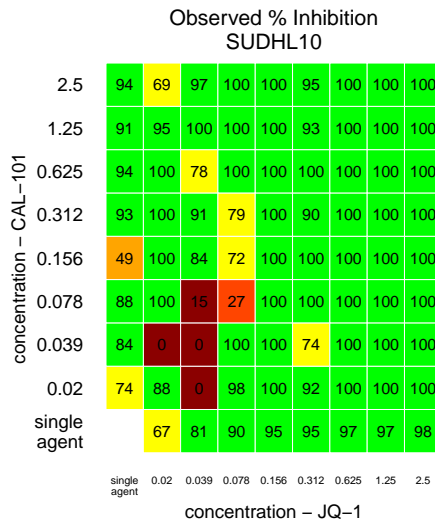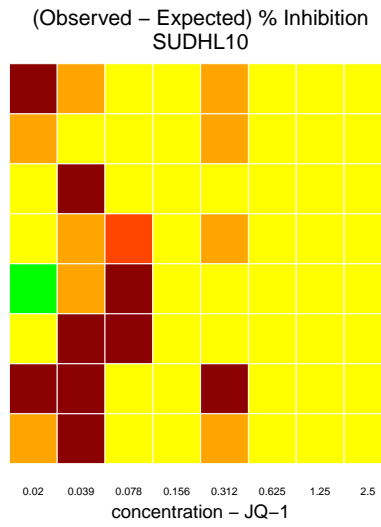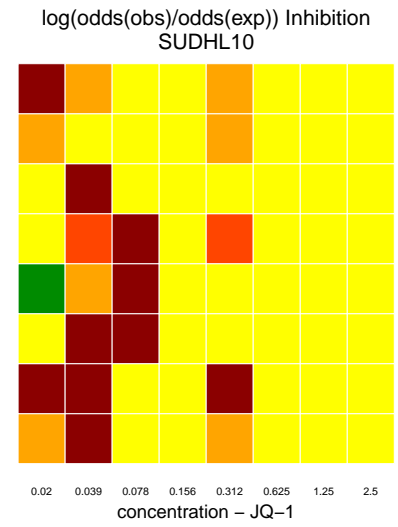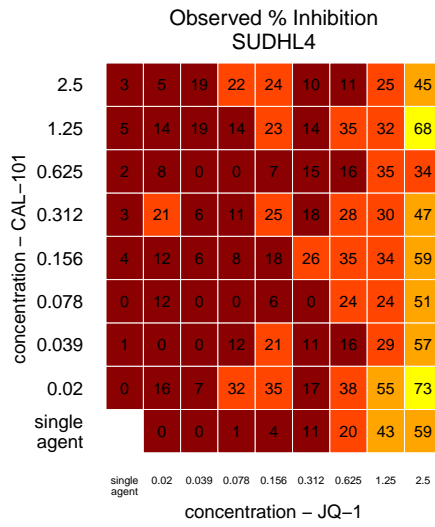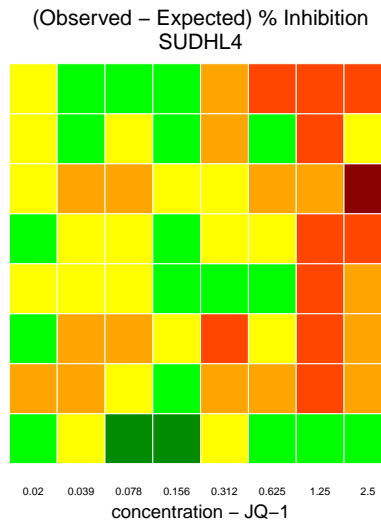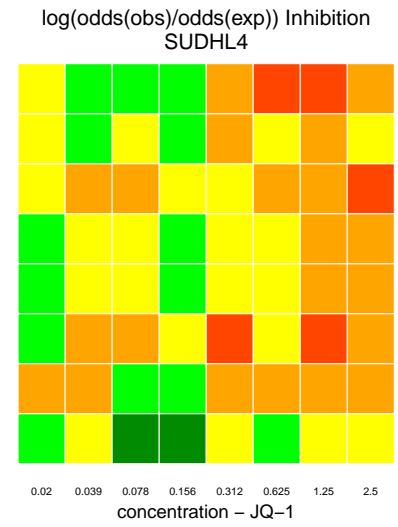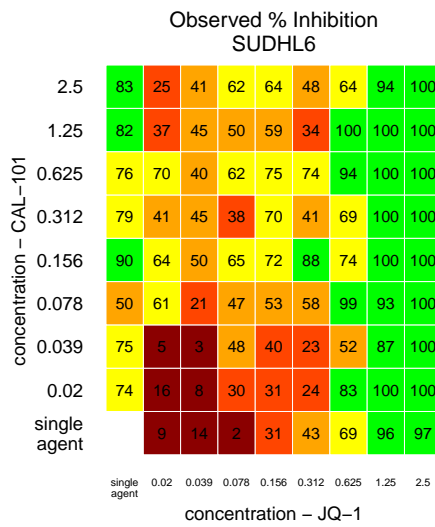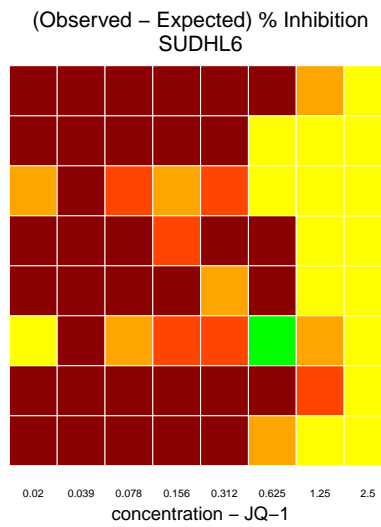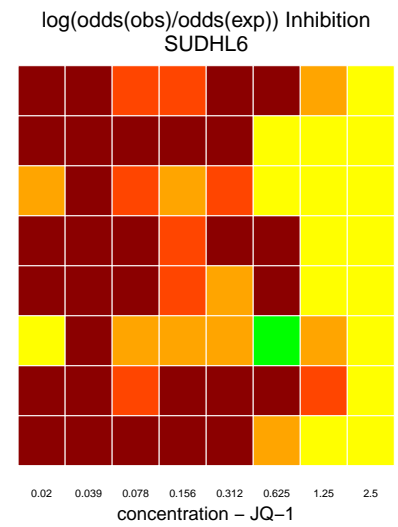

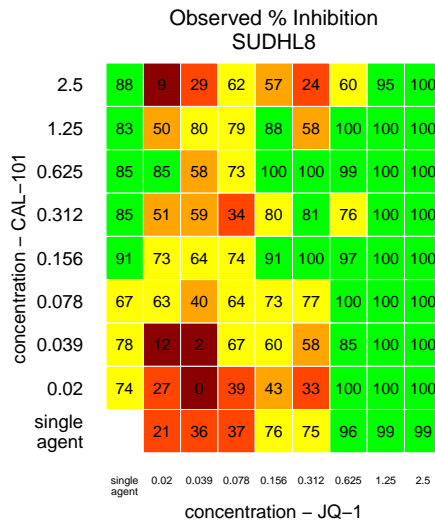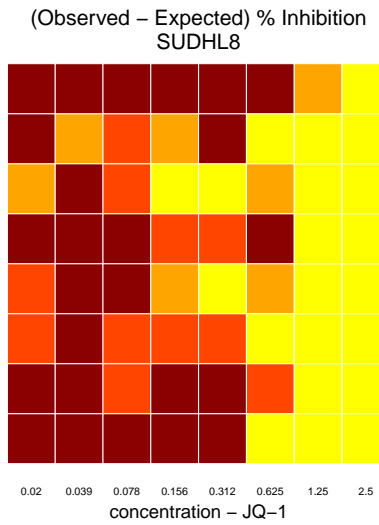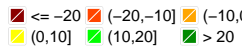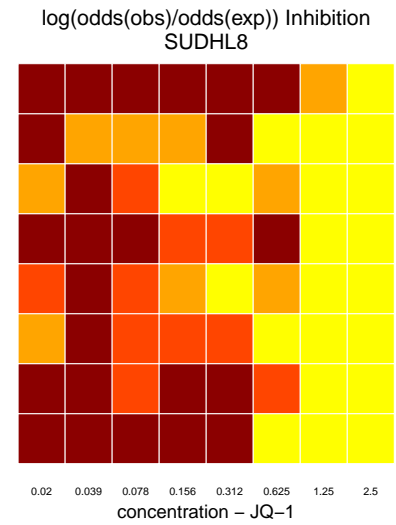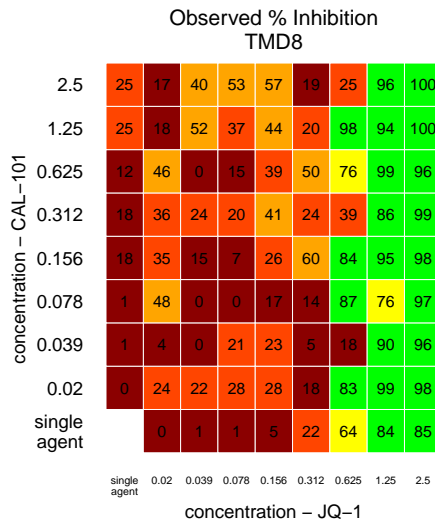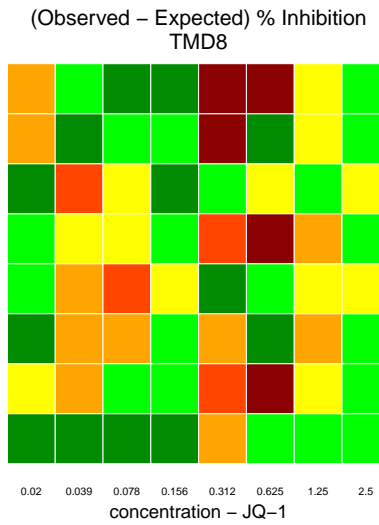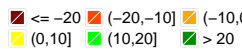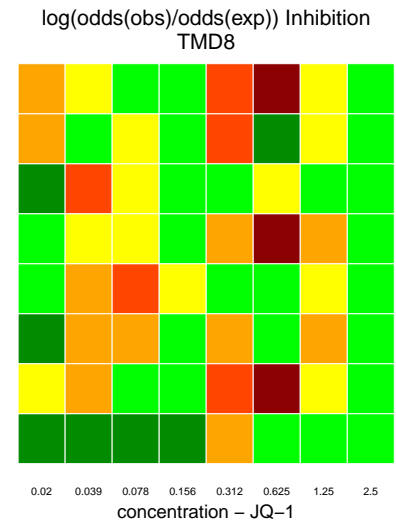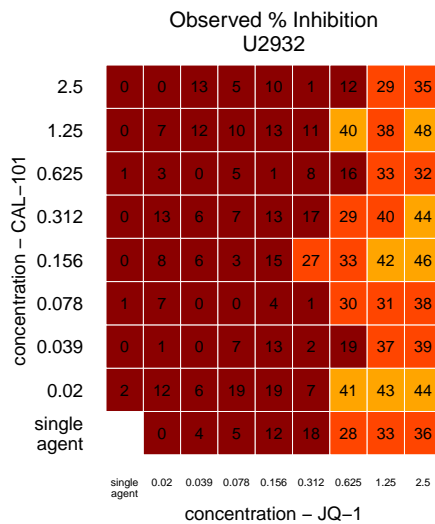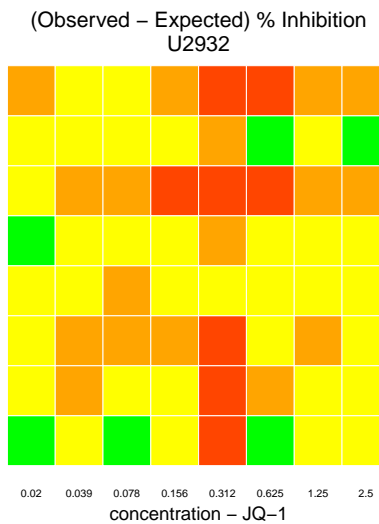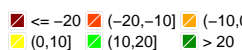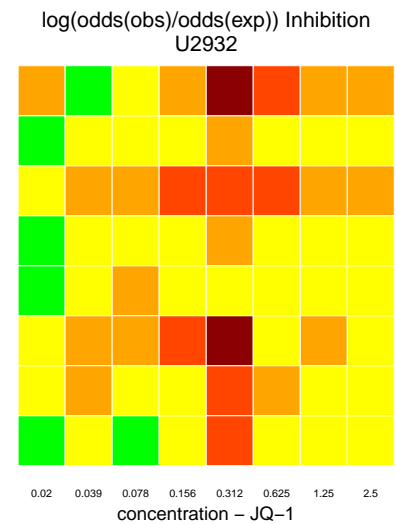



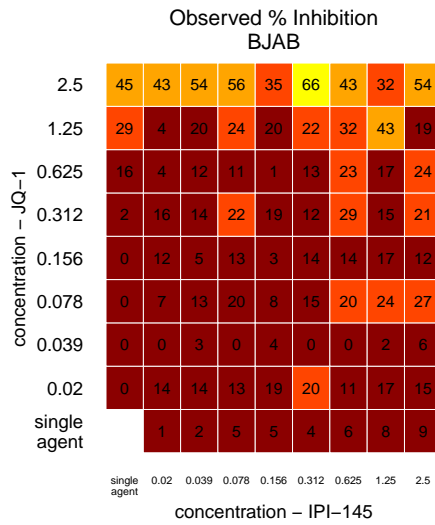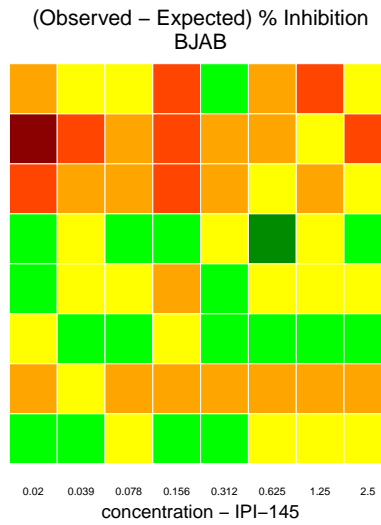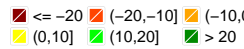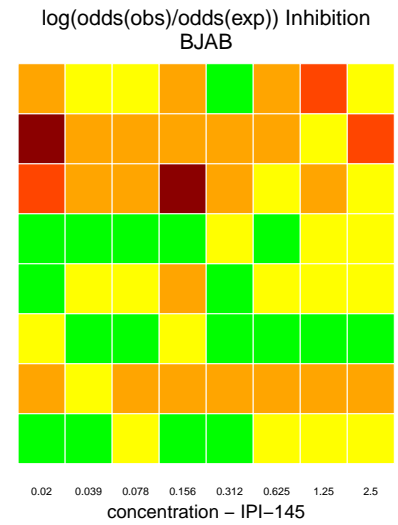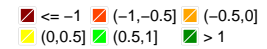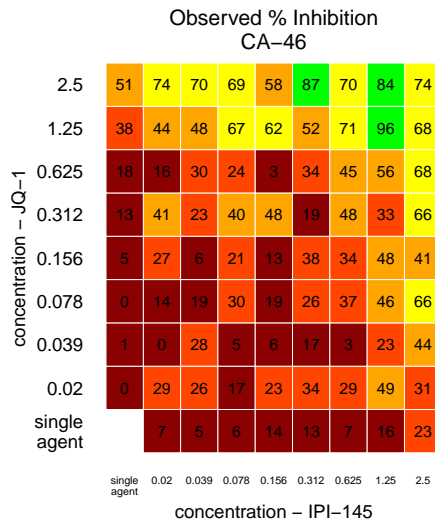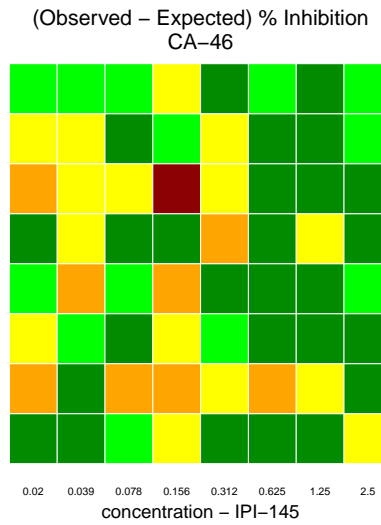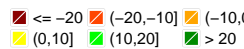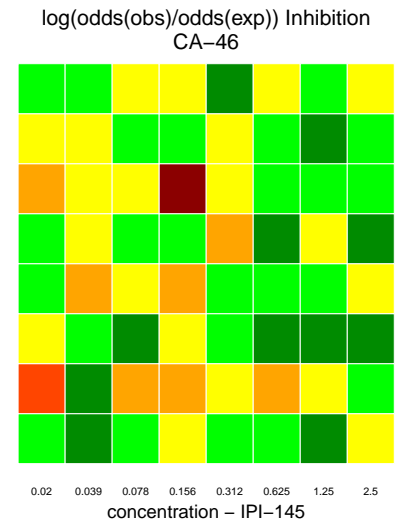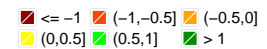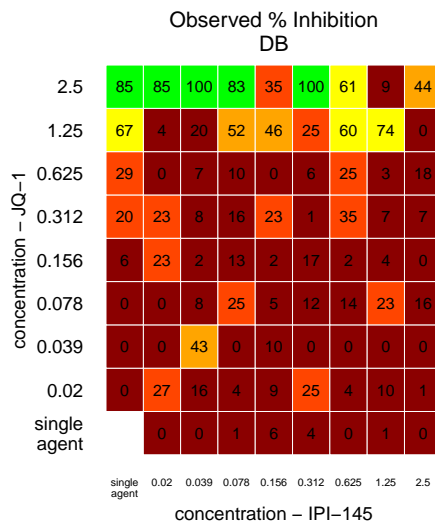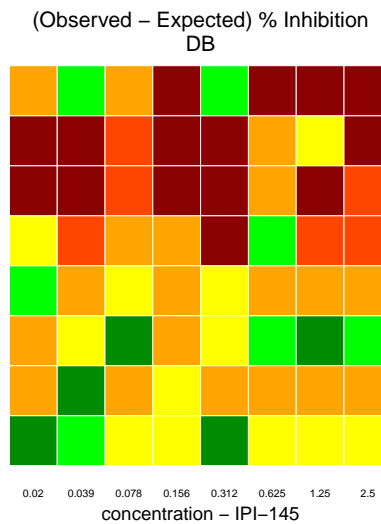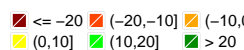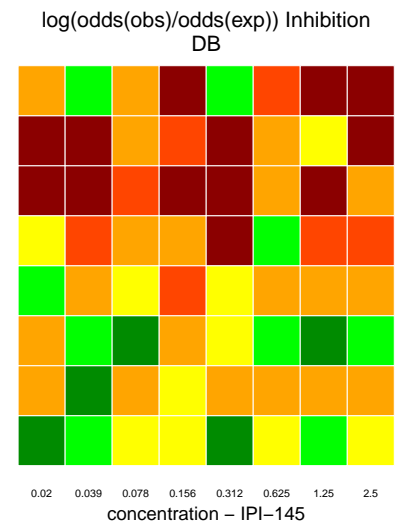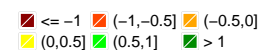

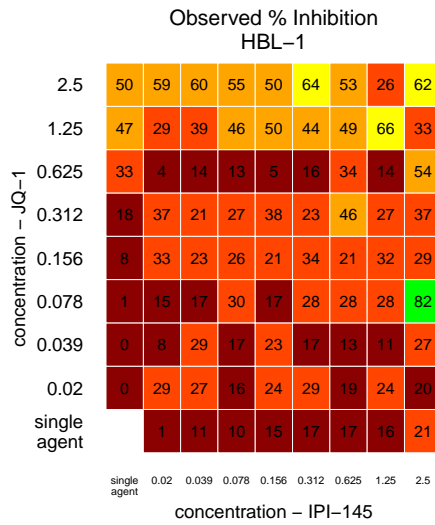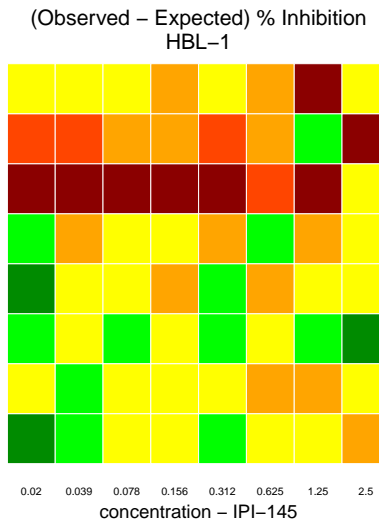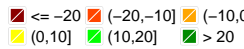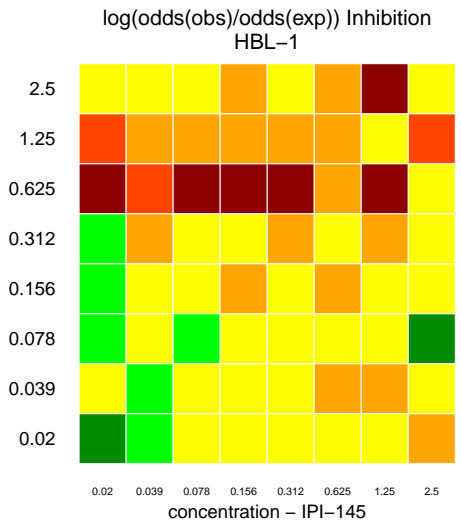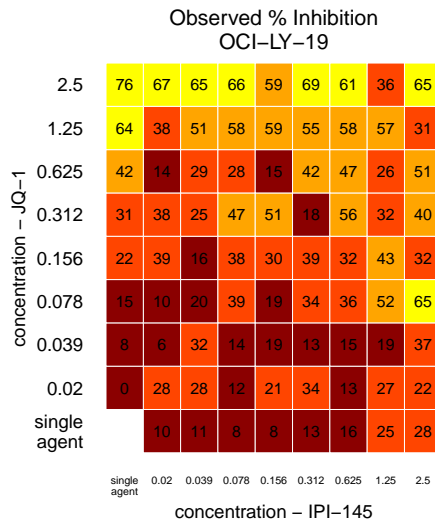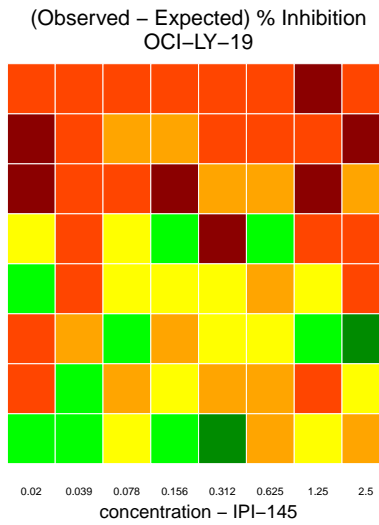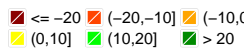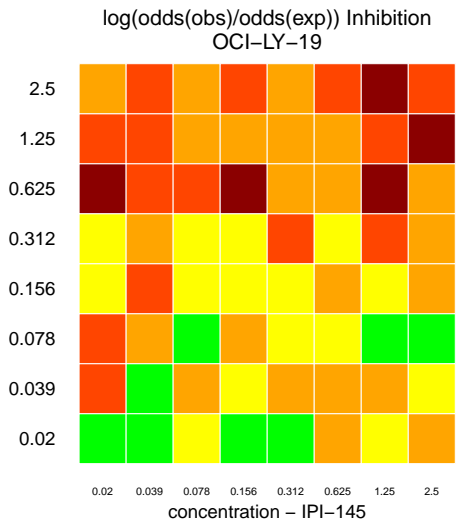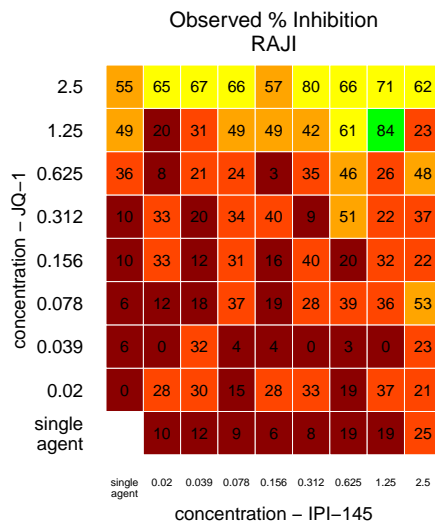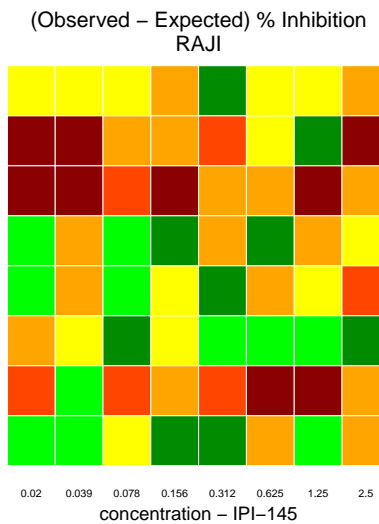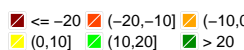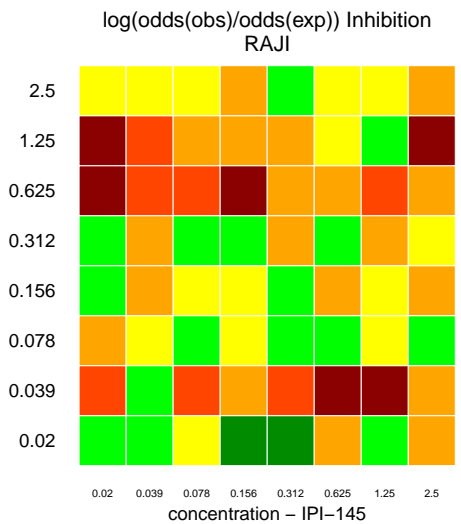

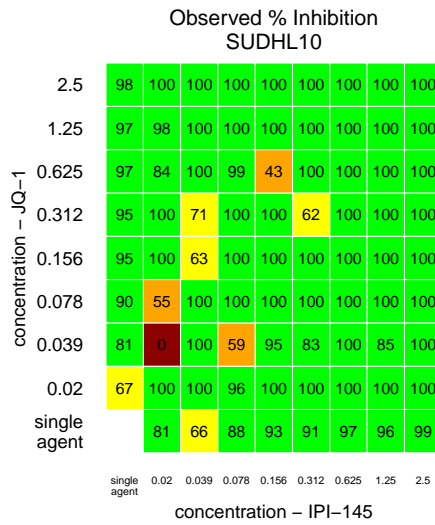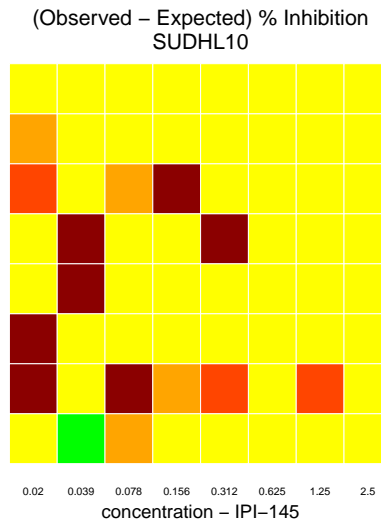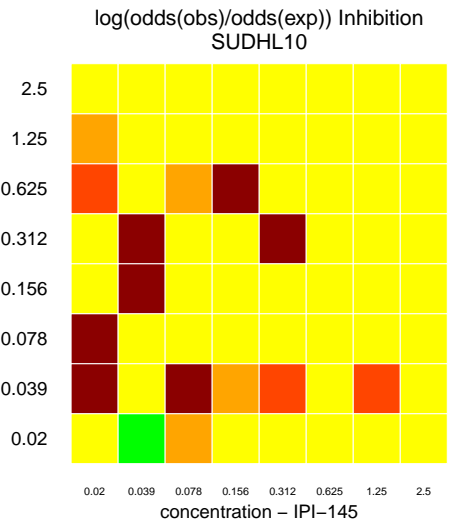

■ [0,20]    ■ (20,40]    ■ (40,60]  
■ (60,80]    ■ (80,100]

■ <= -20    ■ (-20,-10]    ■ (-10,0]  
■ (0,10]    ■ (10,20]    ■ > 20

■ <= -1    ■ (-1,-0.5]    ■ (-0.5,0]  
■ (0,0.5]    ■ (0.5,1]    ■ > 1

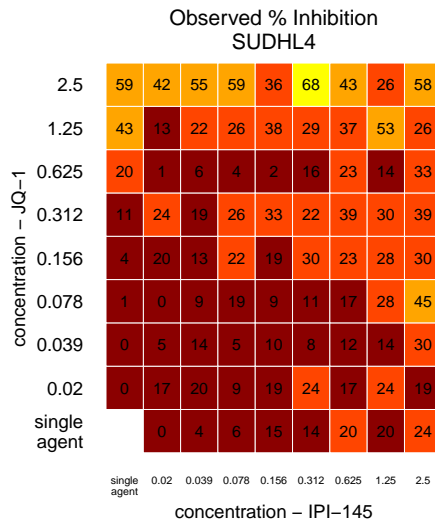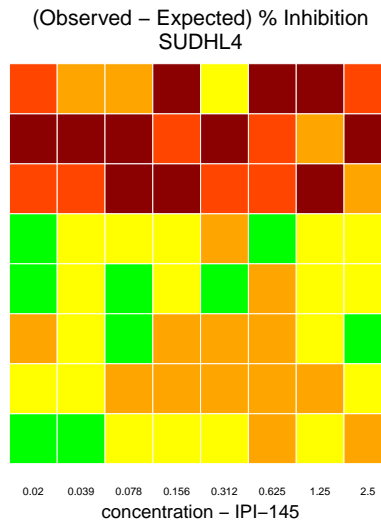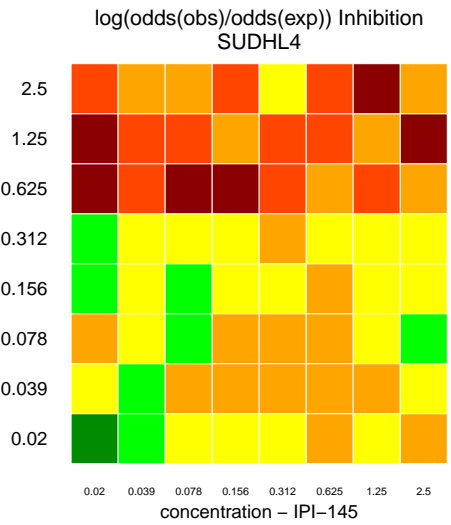

■ [0,20]    ■ (20,40]    ■ (40,60]  
■ (60,80]    ■ (80,100]

■ <= -20    ■ (-20,-10]    ■ (-10,0]  
■ (0,10]    ■ (10,20]    ■ > 20

■ <= -1    ■ (-1,-0.5]    ■ (-0.5,0]  
■ (0,0.5]    ■ (0.5,1]    ■ > 1

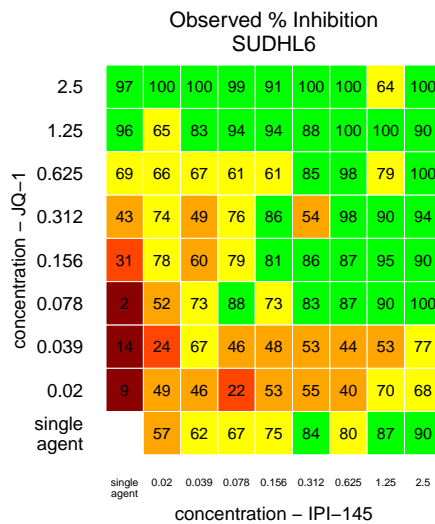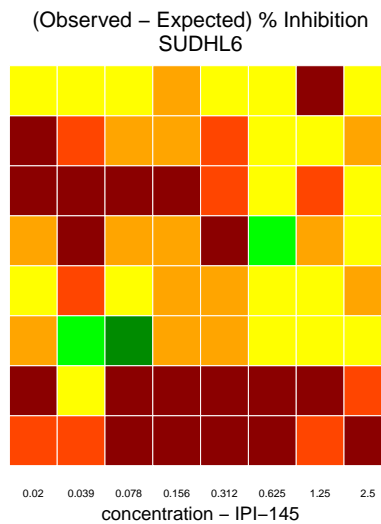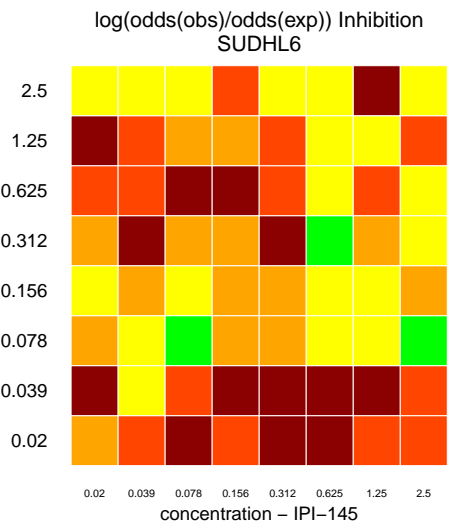

■ [0,20]    ■ (20,40]    ■ (40,60]  
■ (60,80]    ■ (80,100]

■ <= -20    ■ (-20,-10]    ■ (-10,0]  
■ (0,10]    ■ (10,20]    ■ > 20

■ <= -1    ■ (-1,-0.5]    ■ (-0.5,0]  
■ (0,0.5]    ■ (0.5,1]    ■ > 1

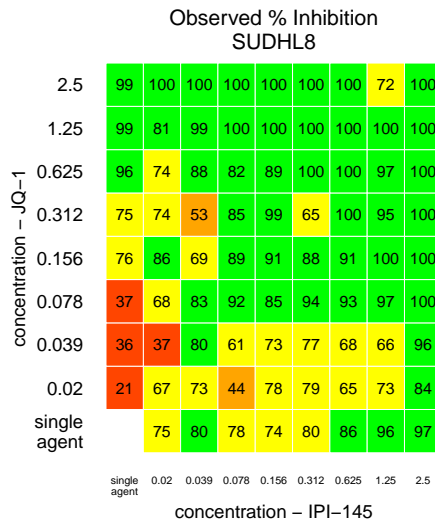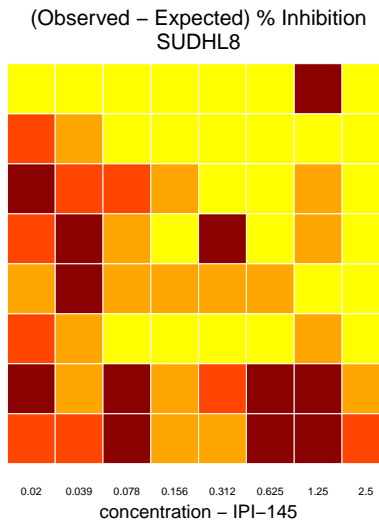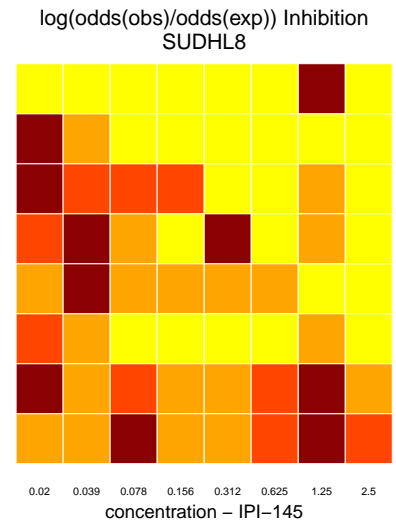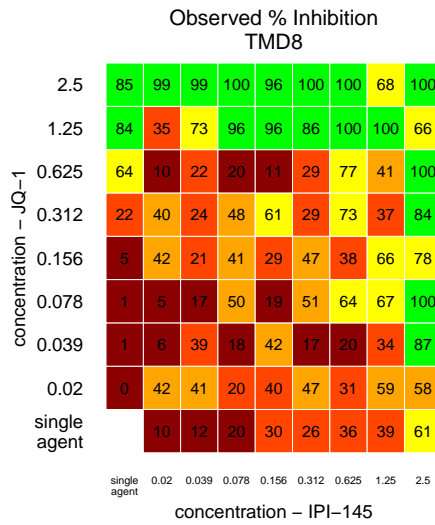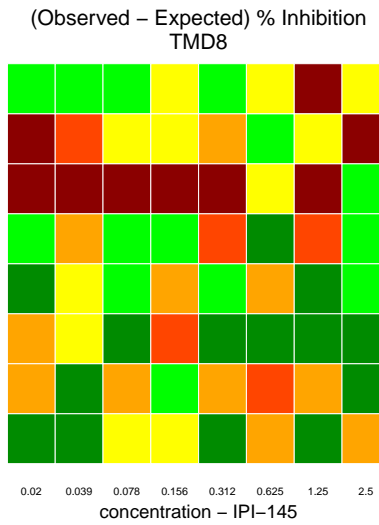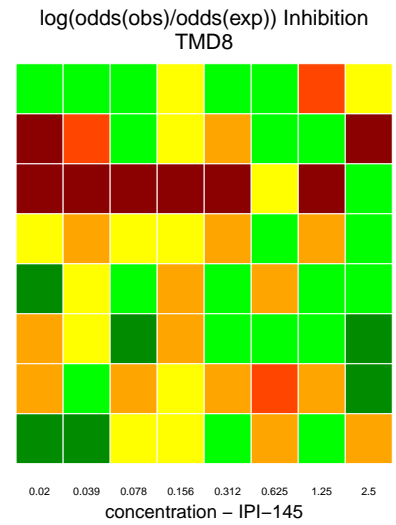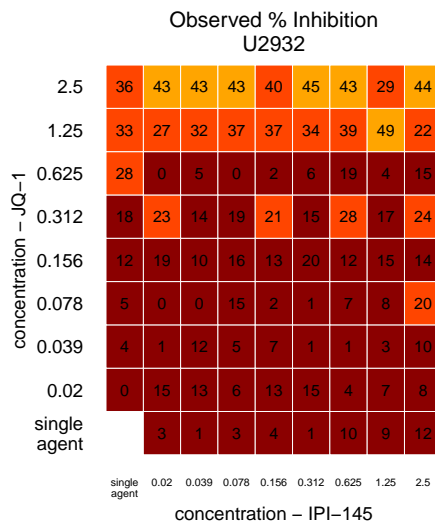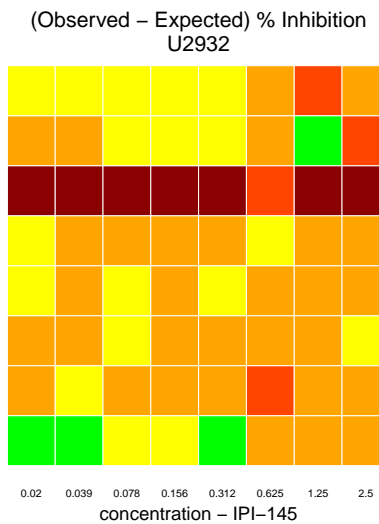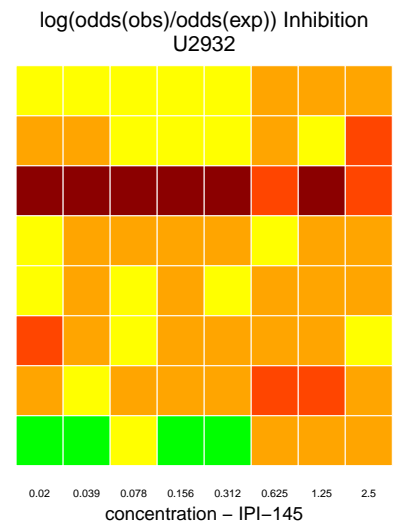

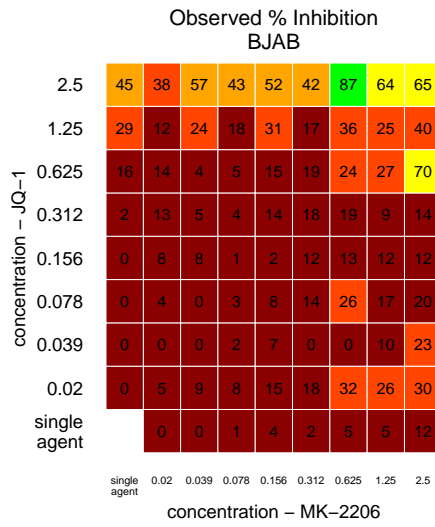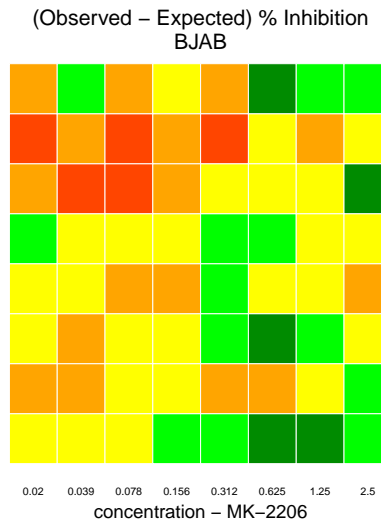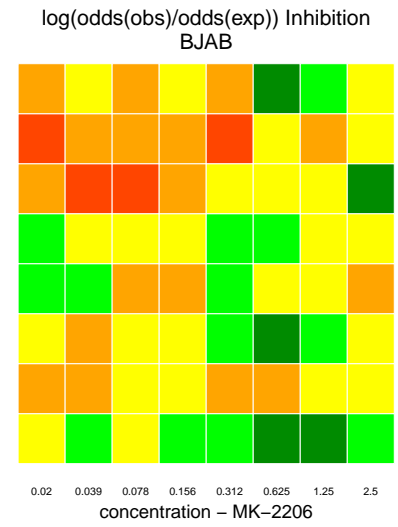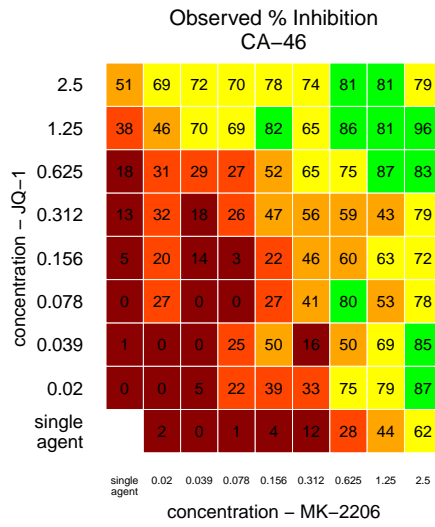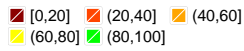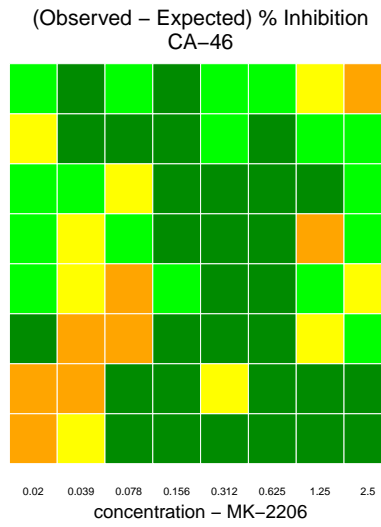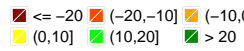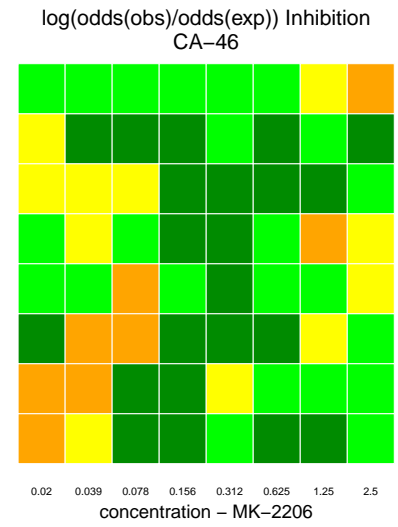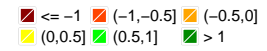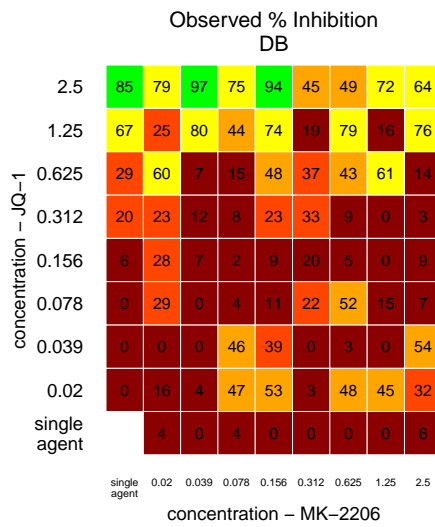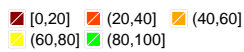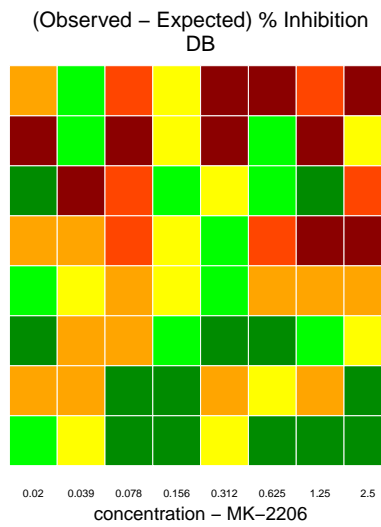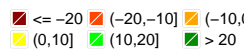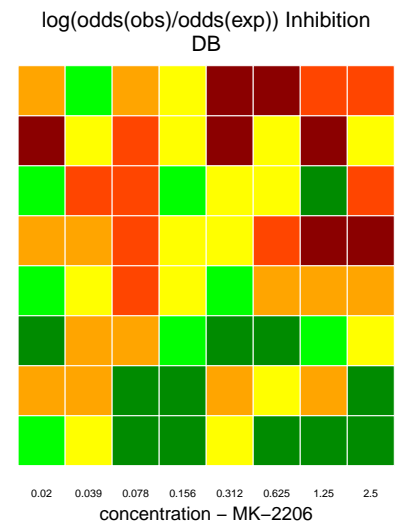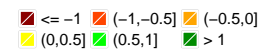

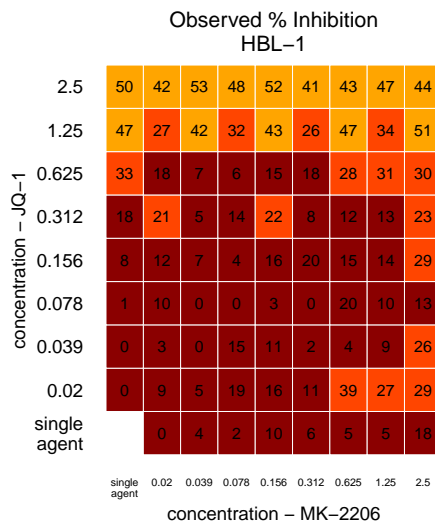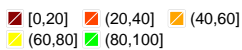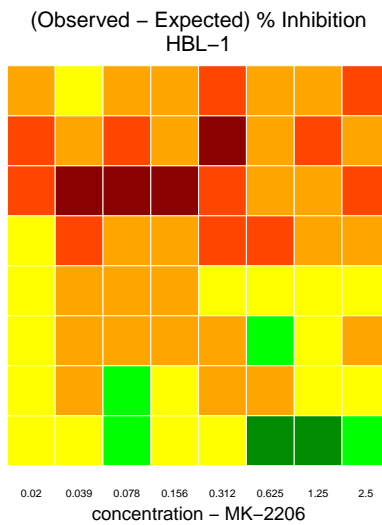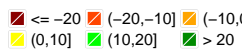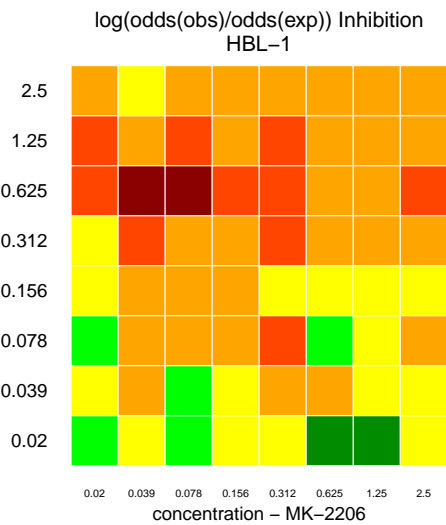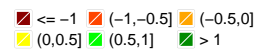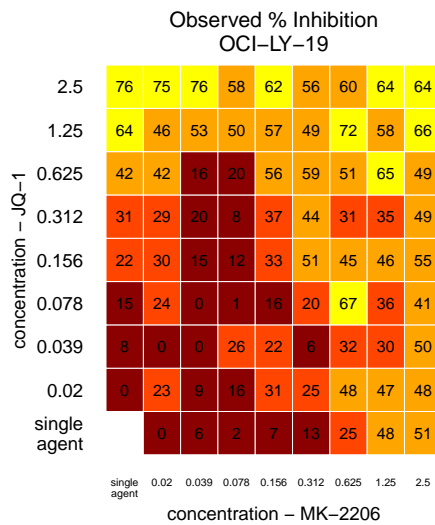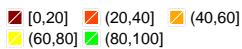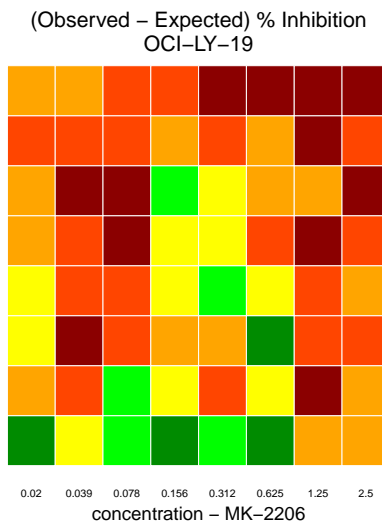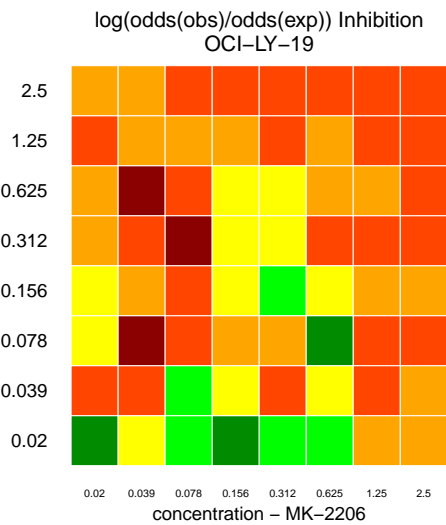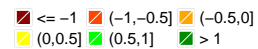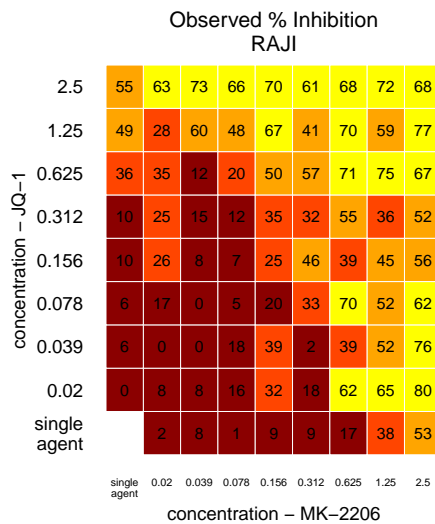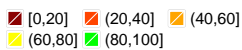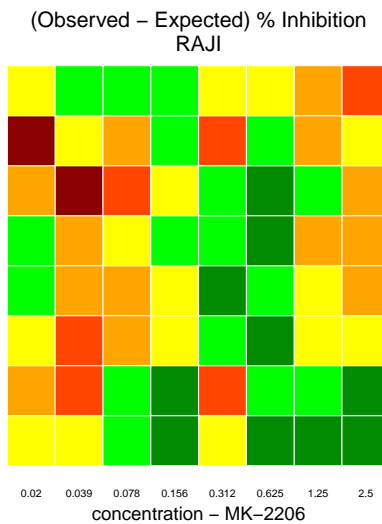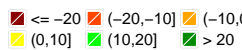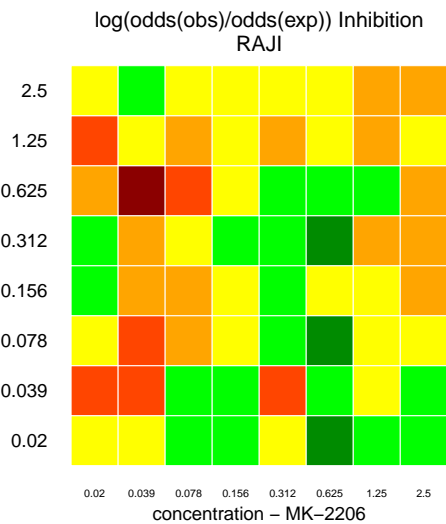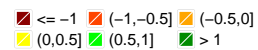

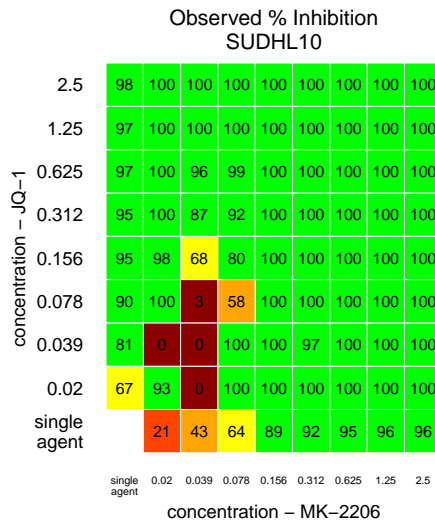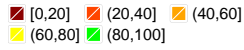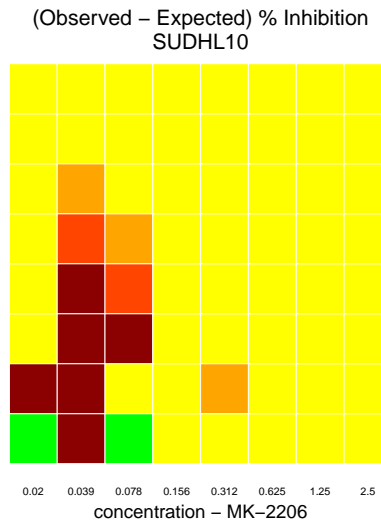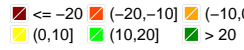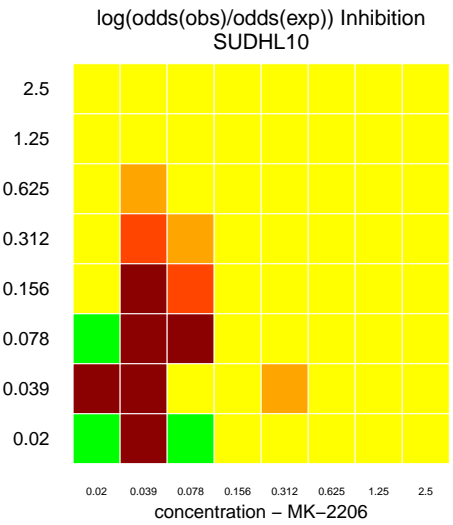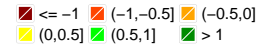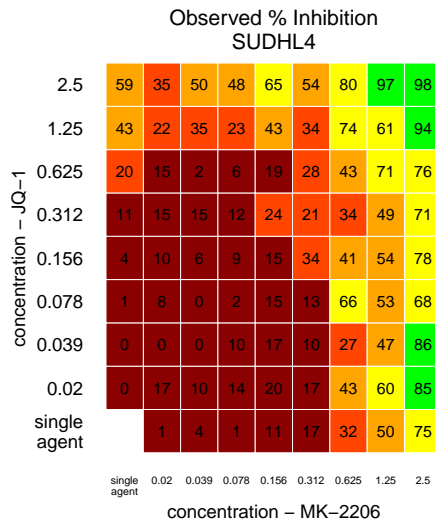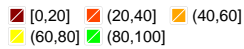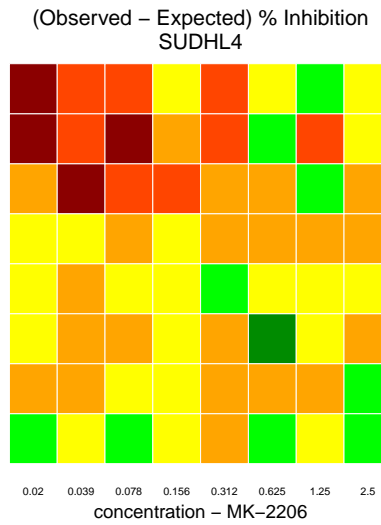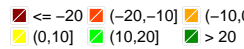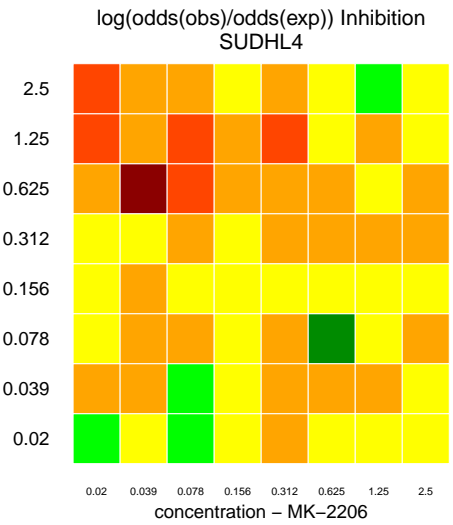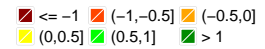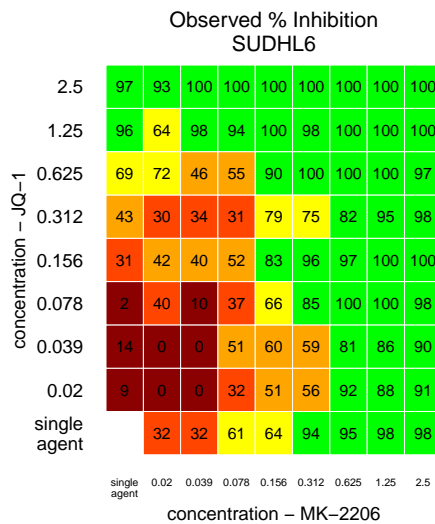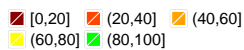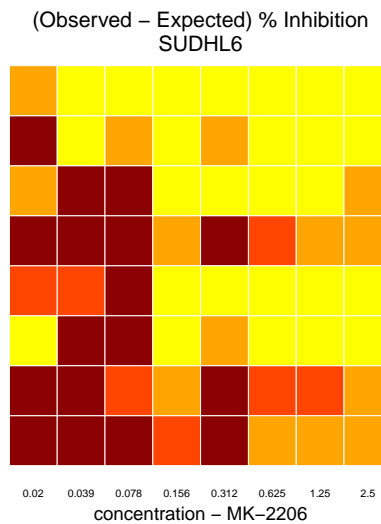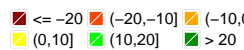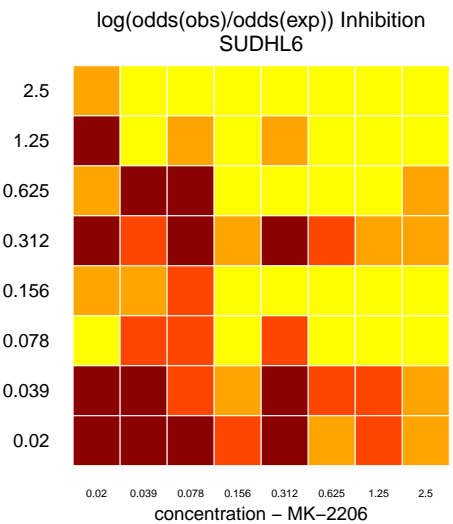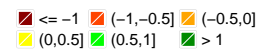

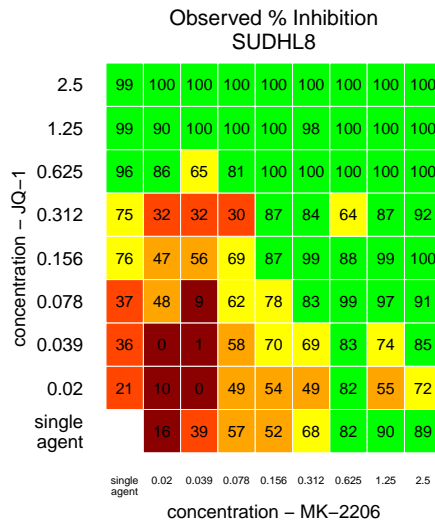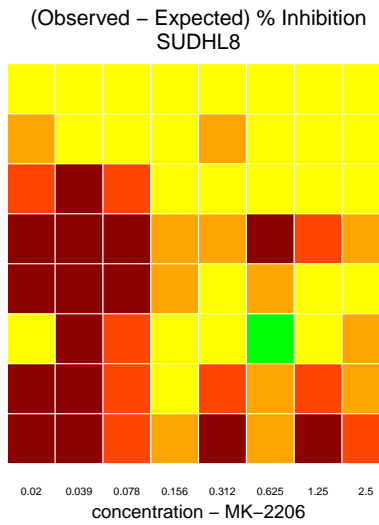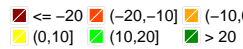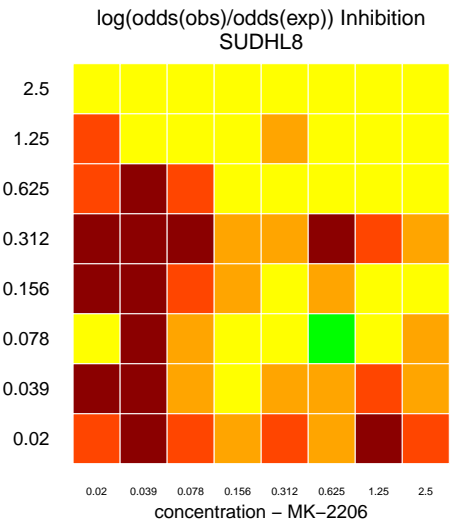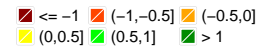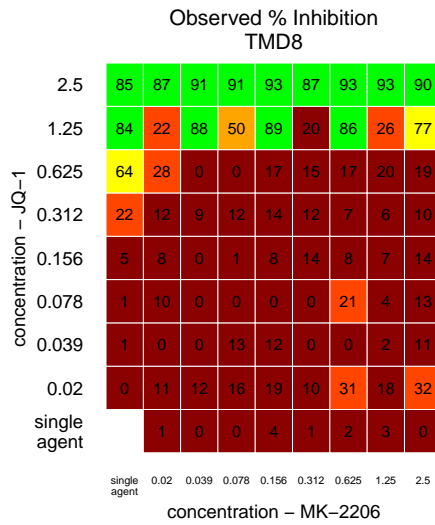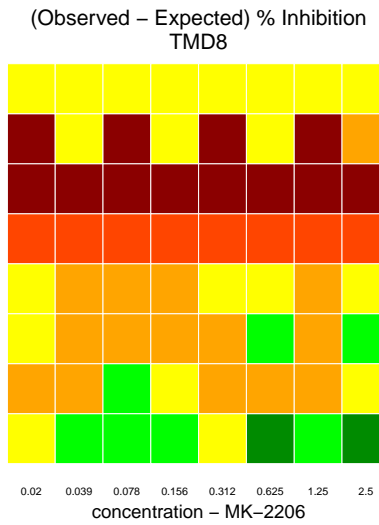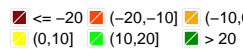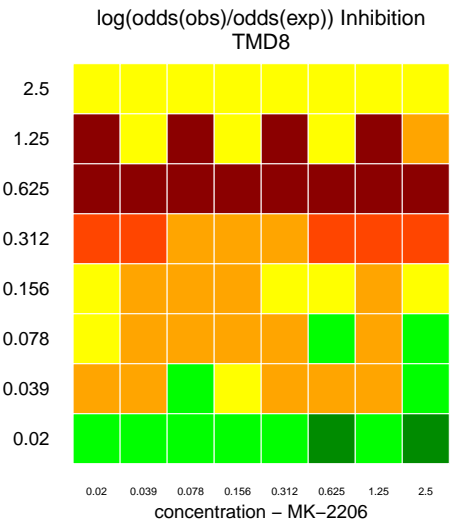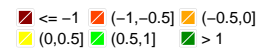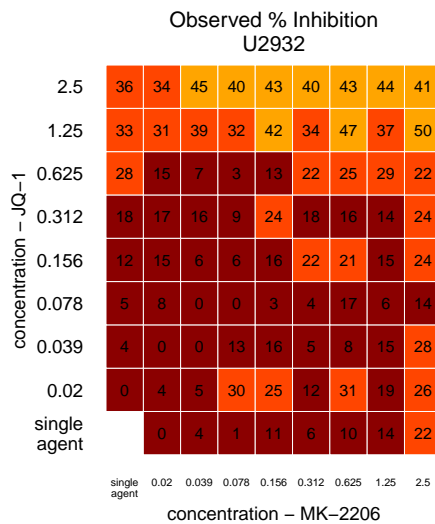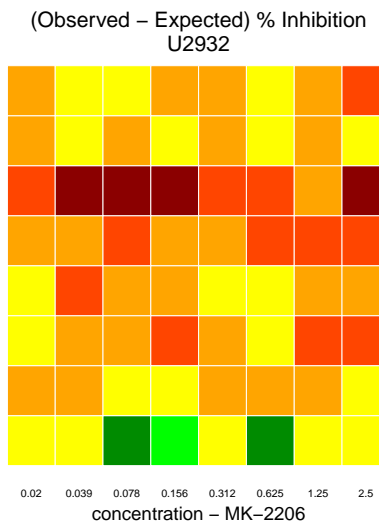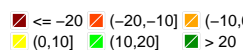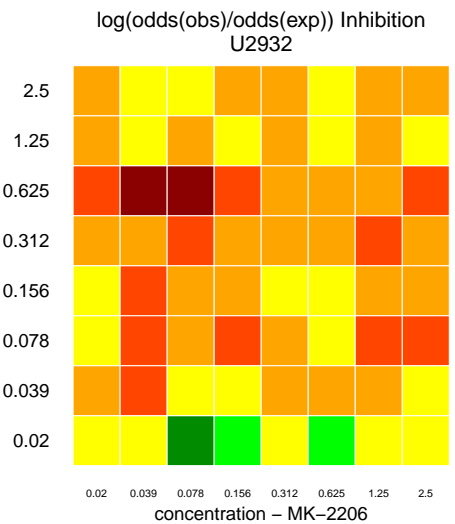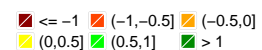



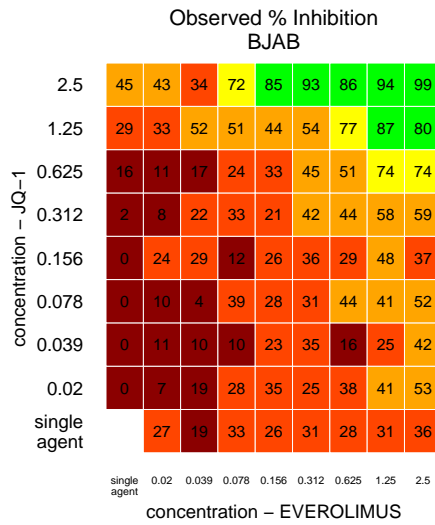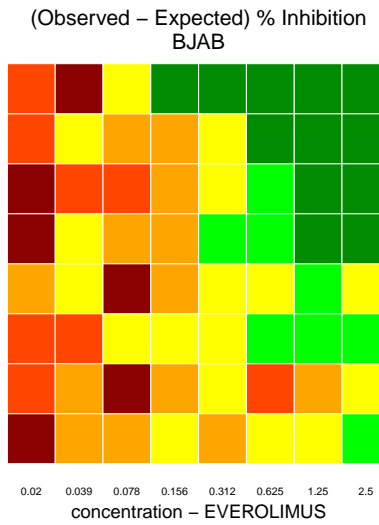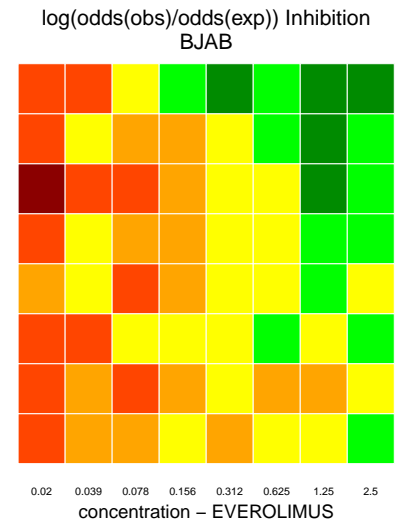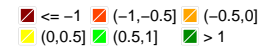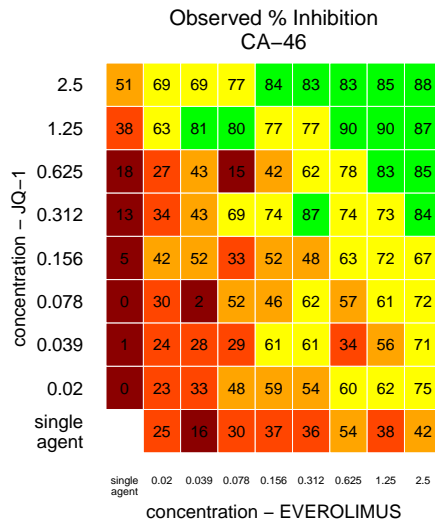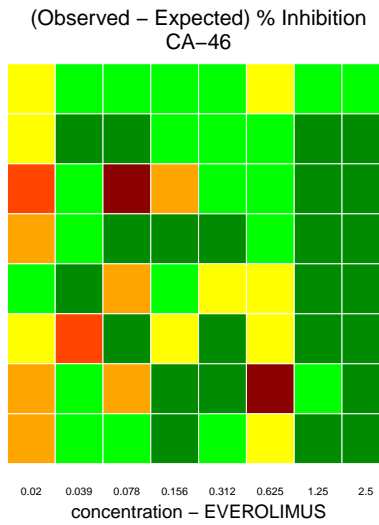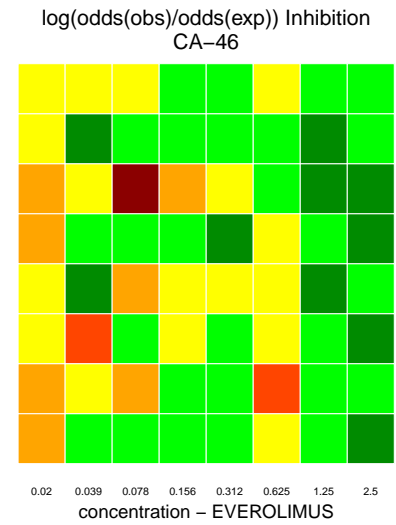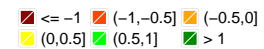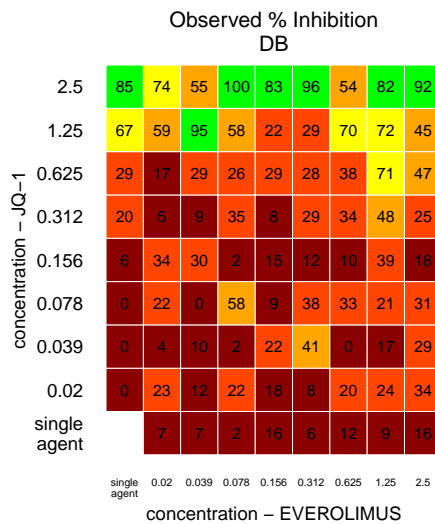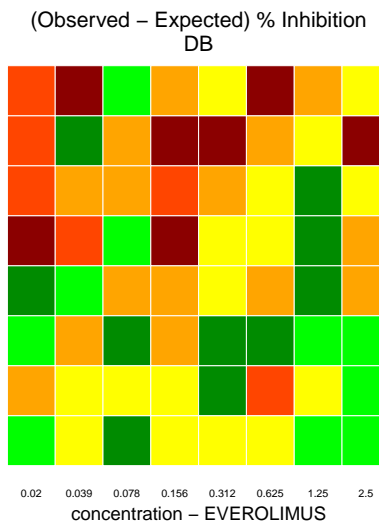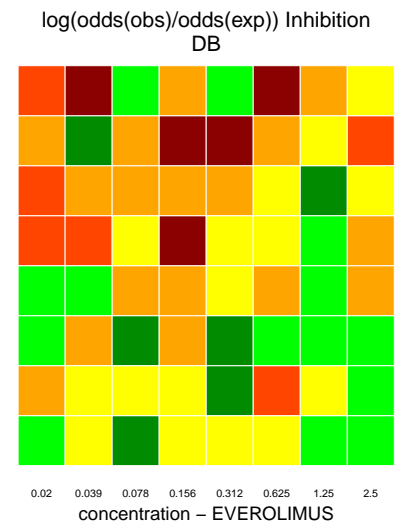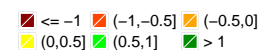

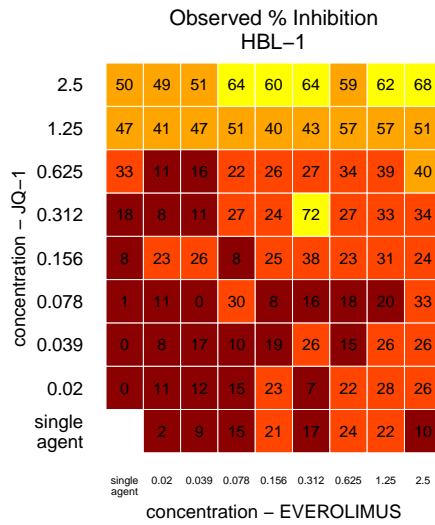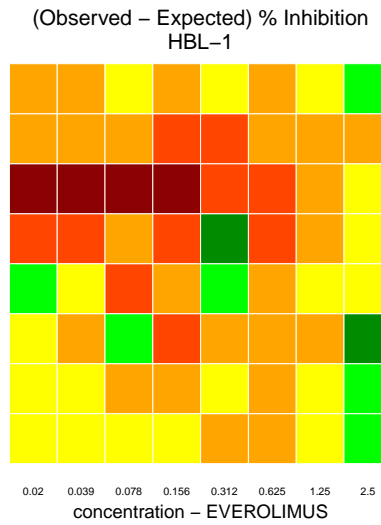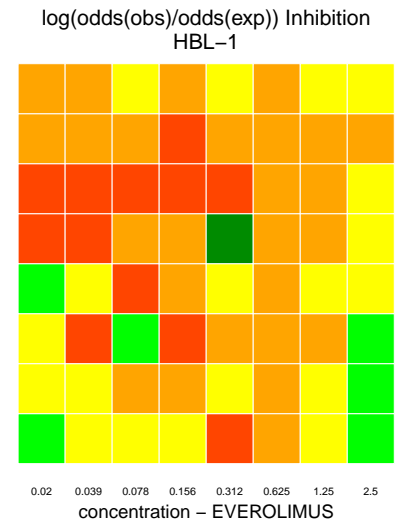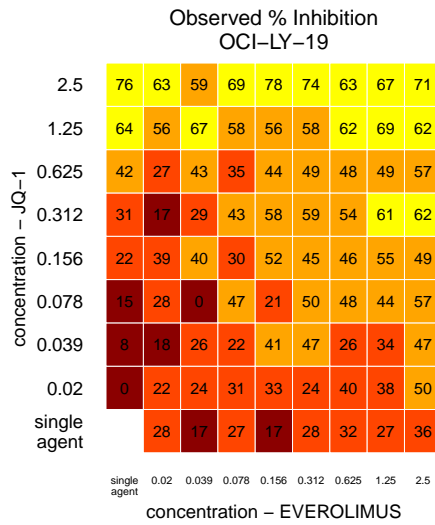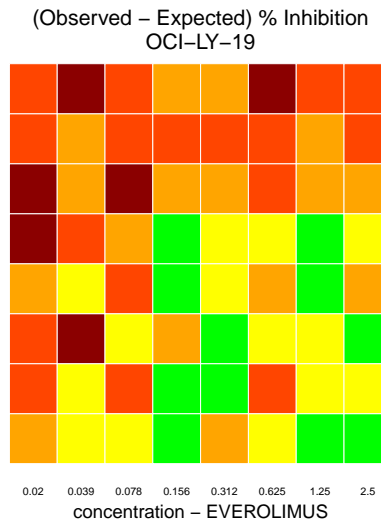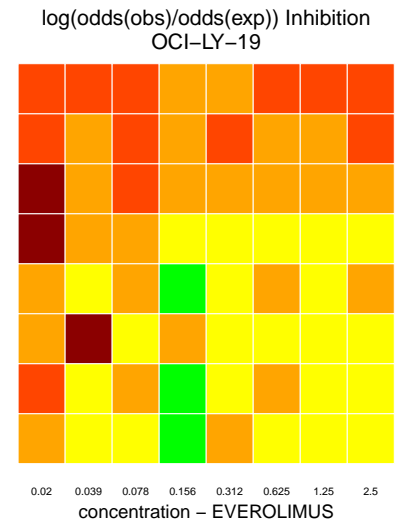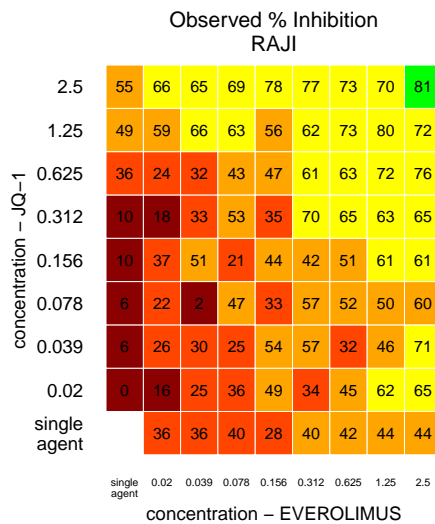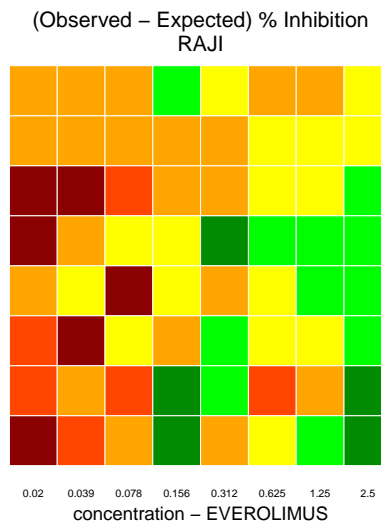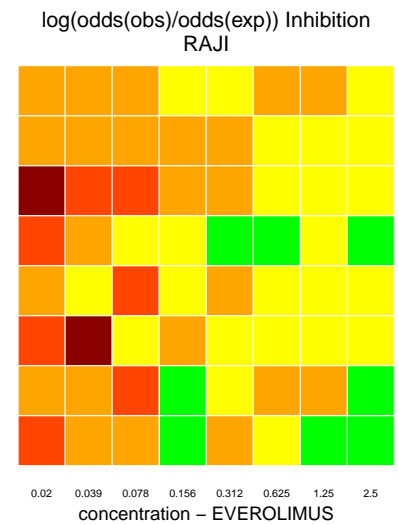

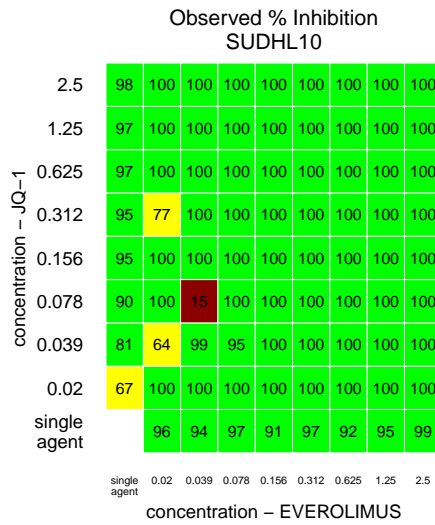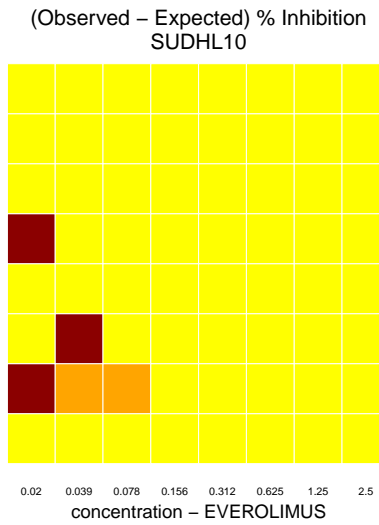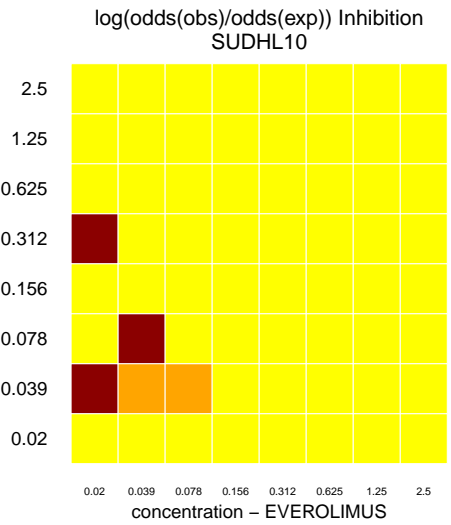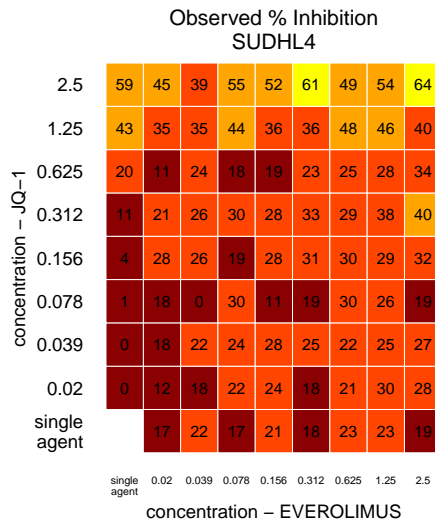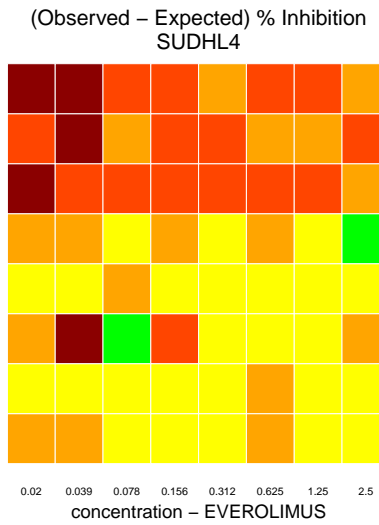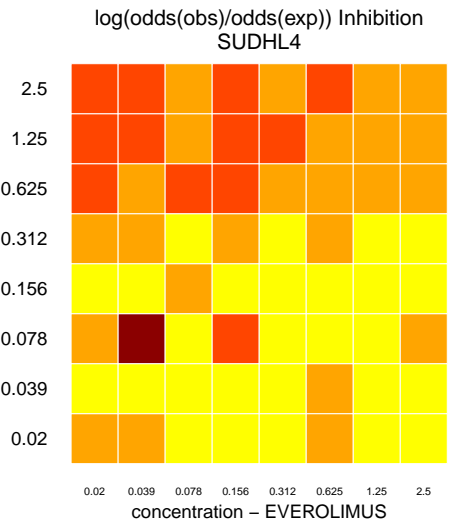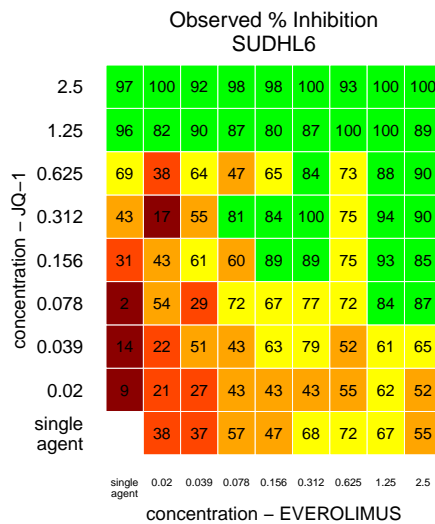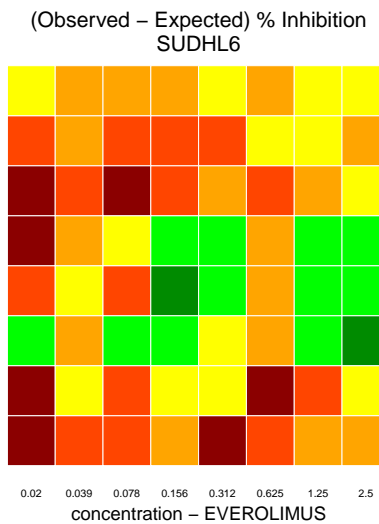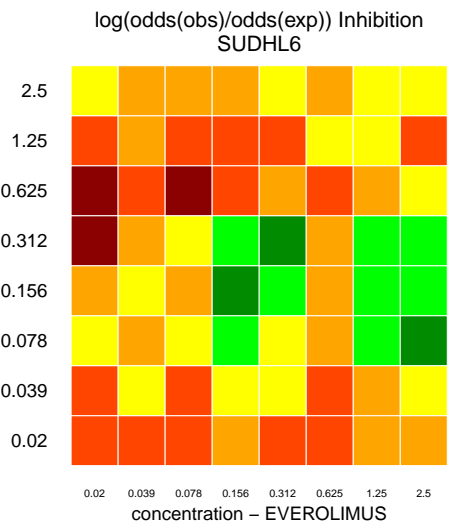

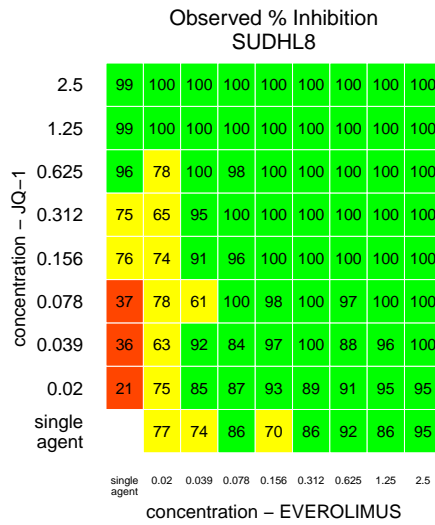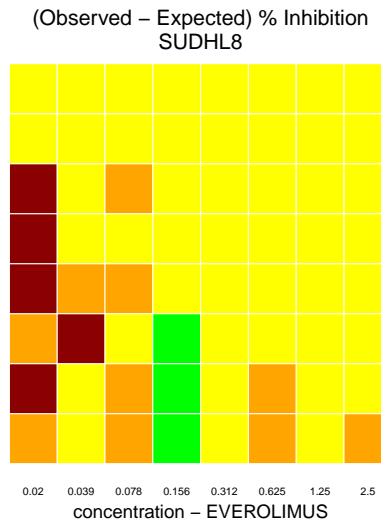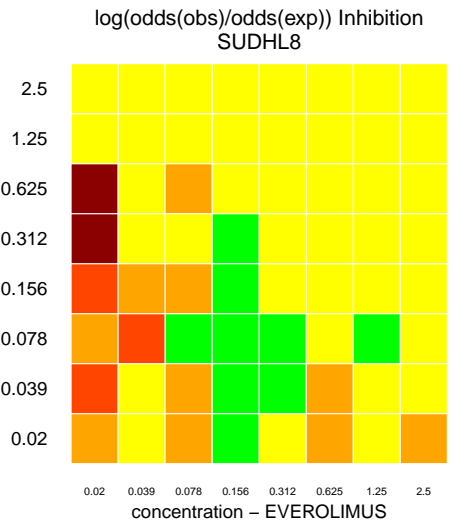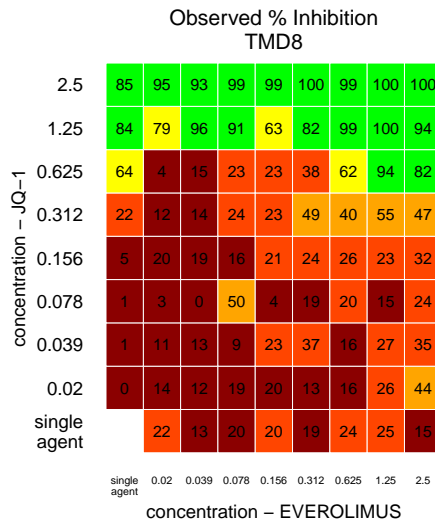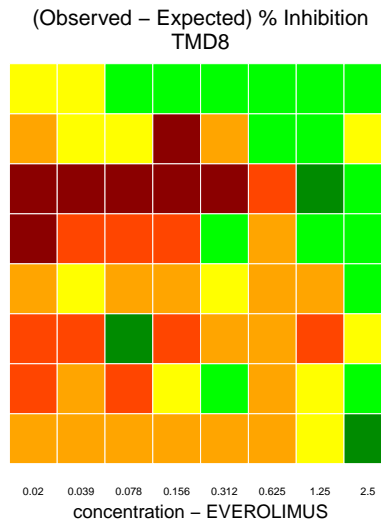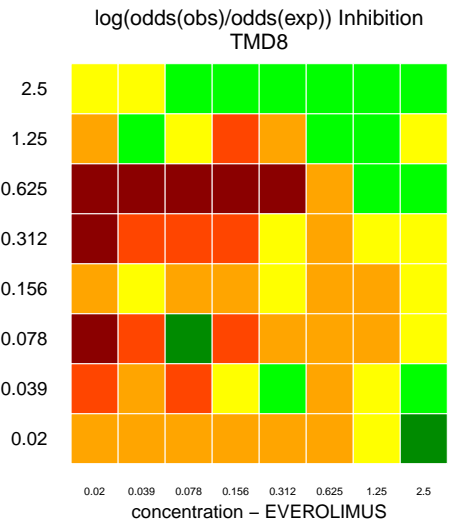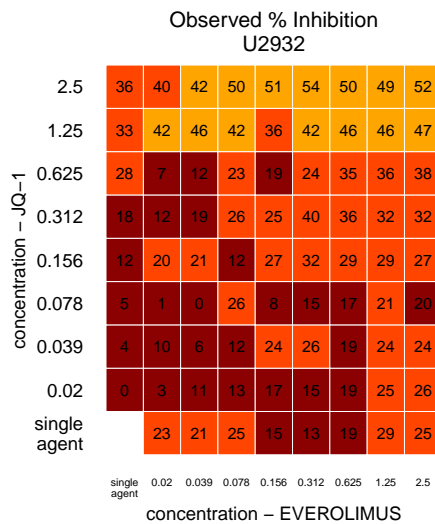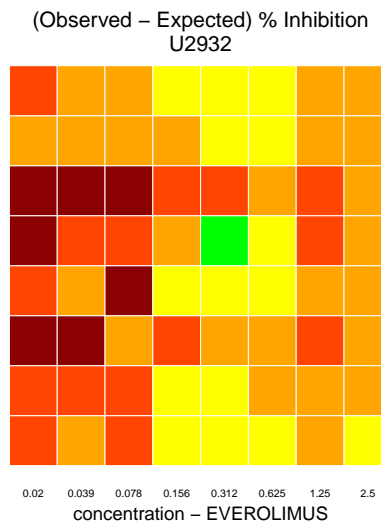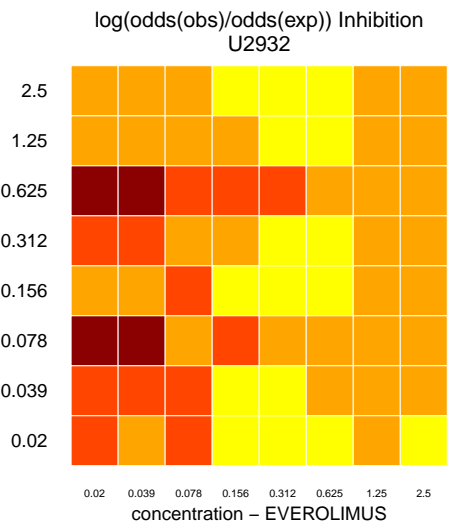

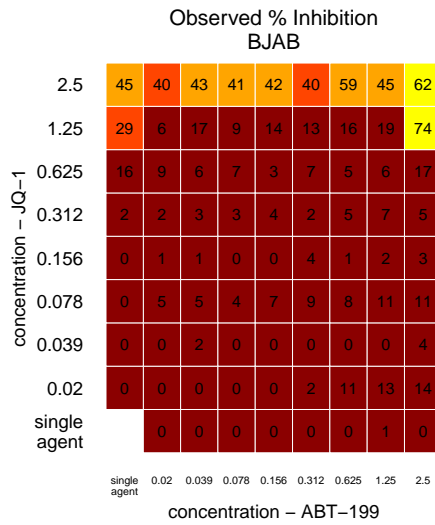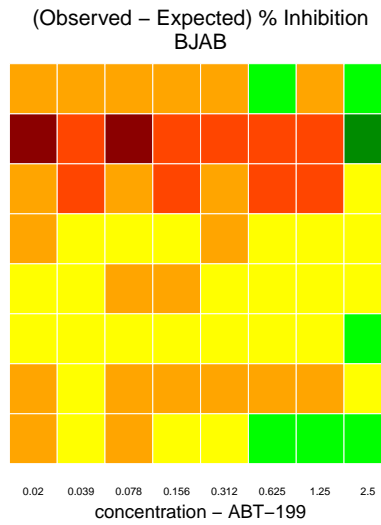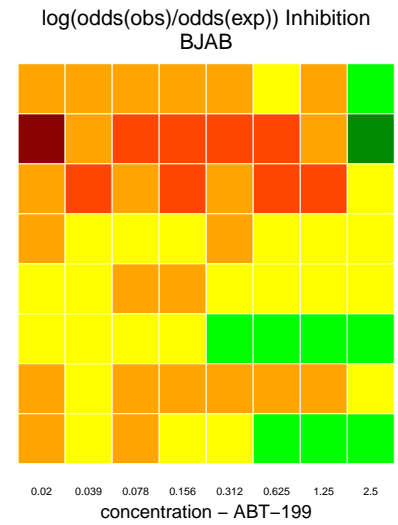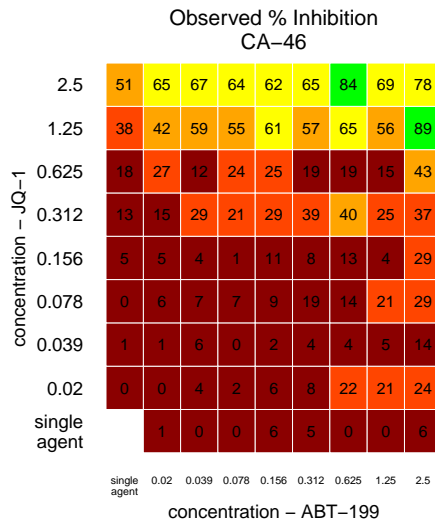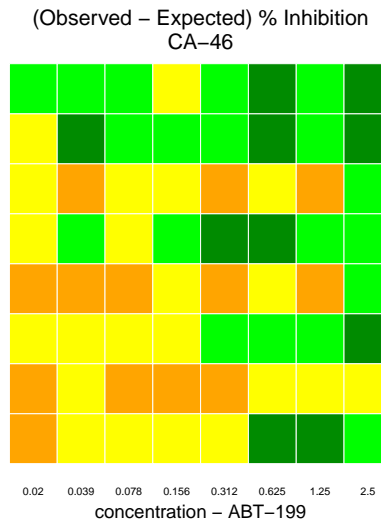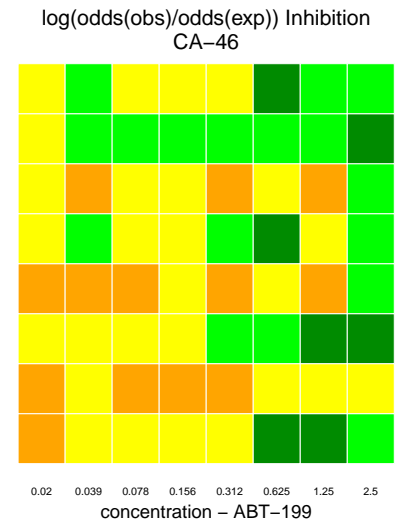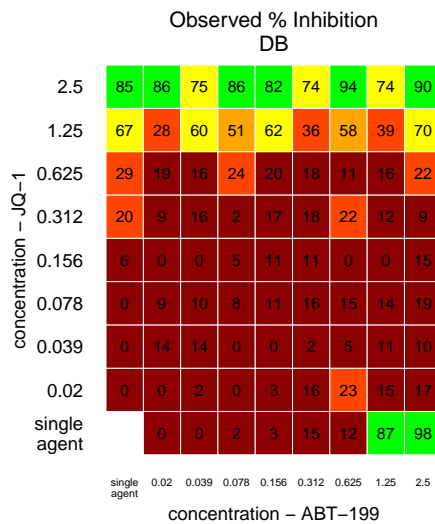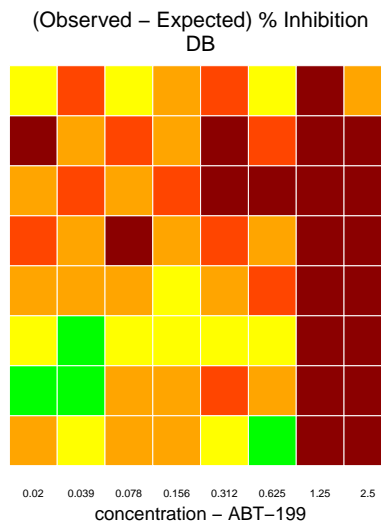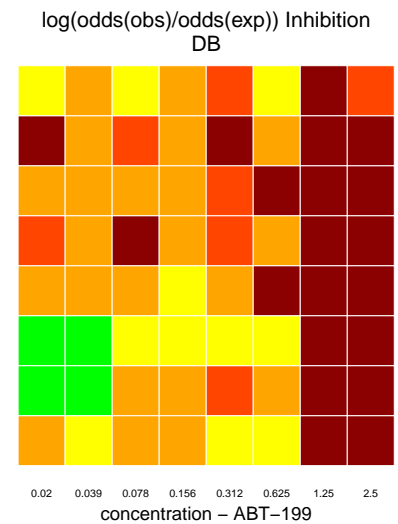

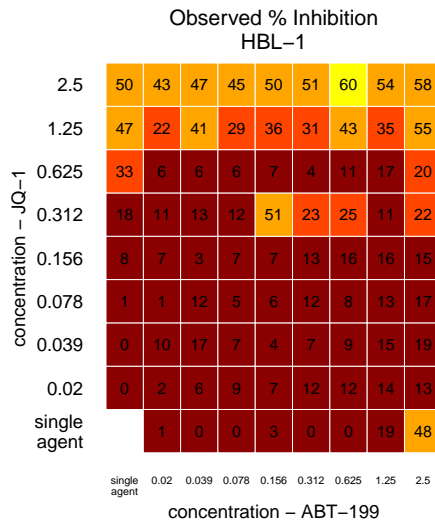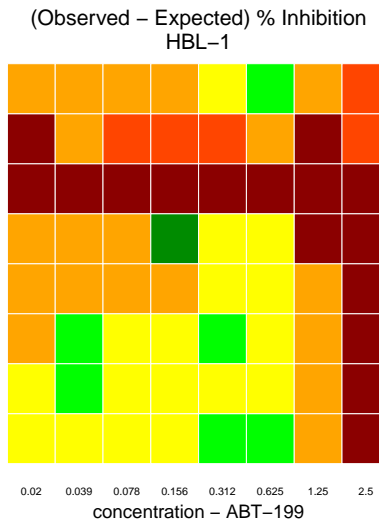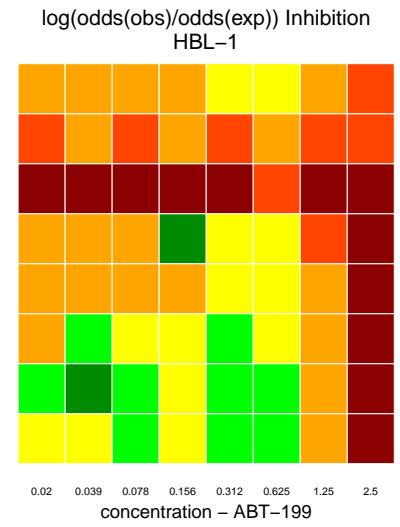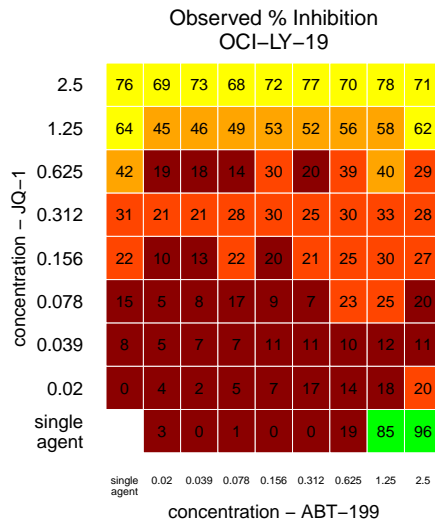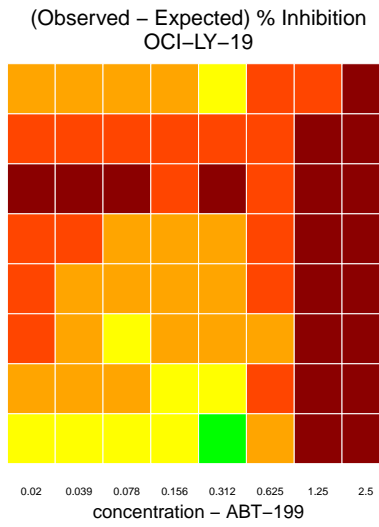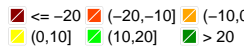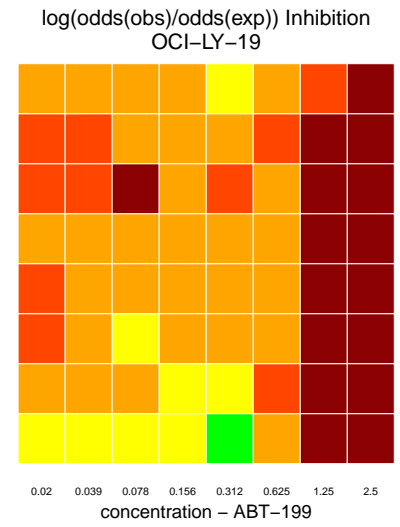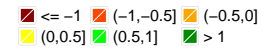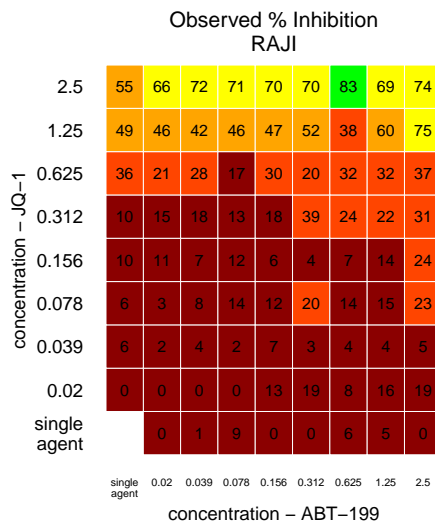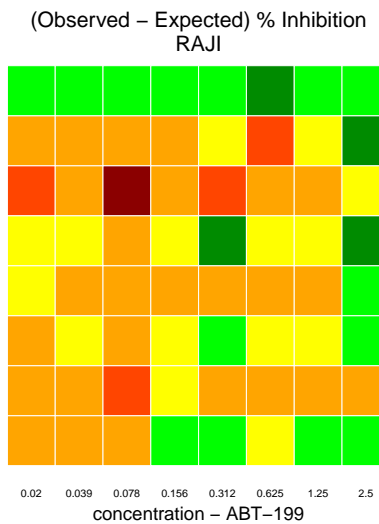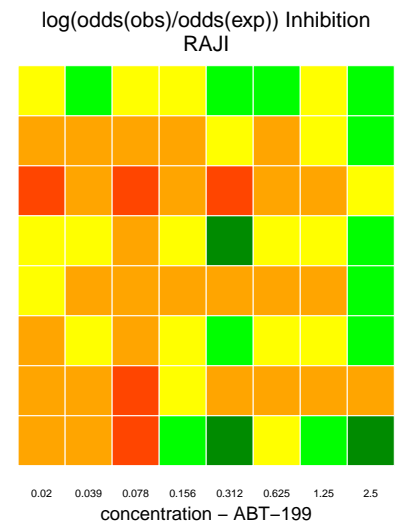

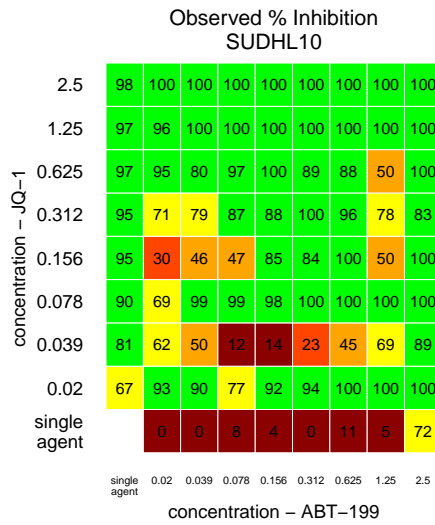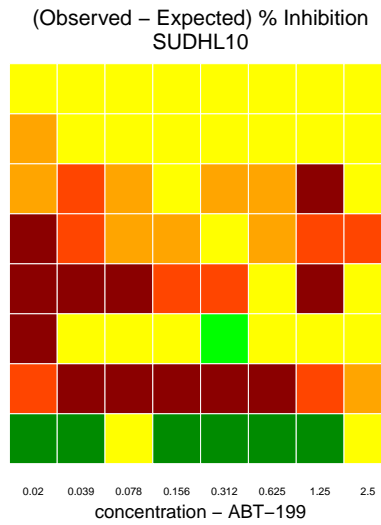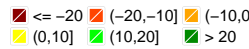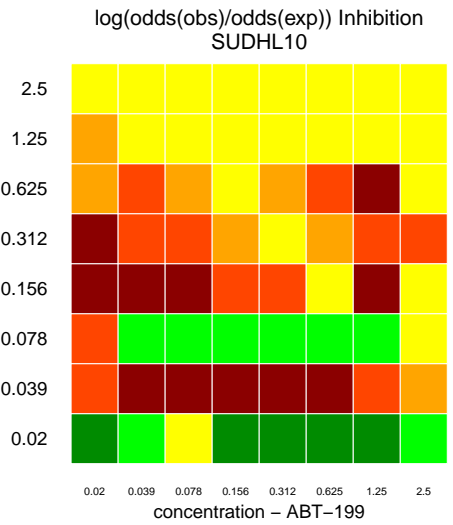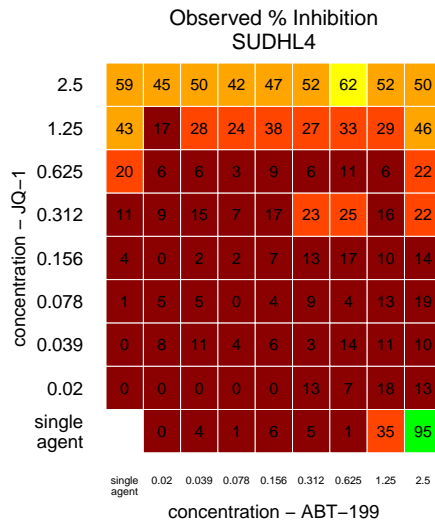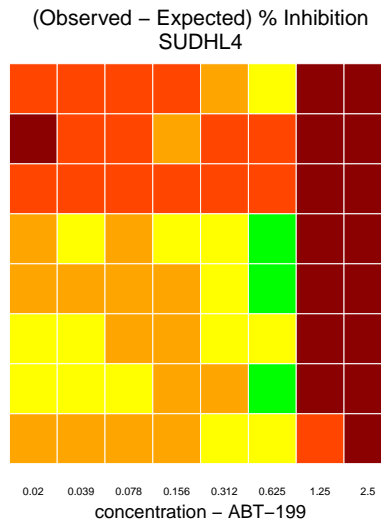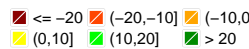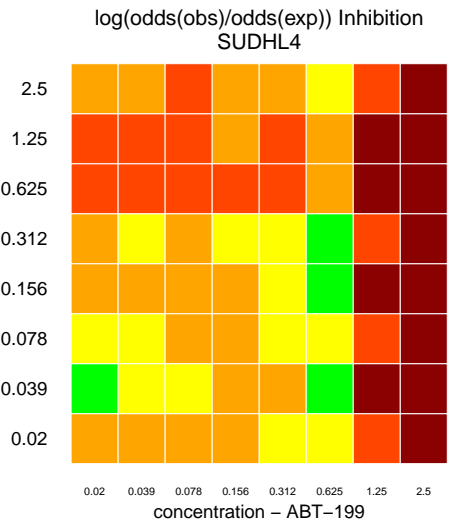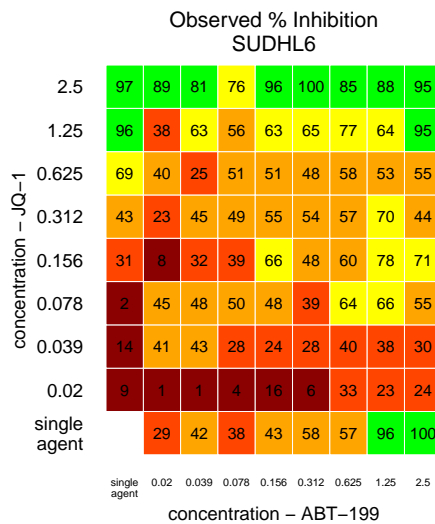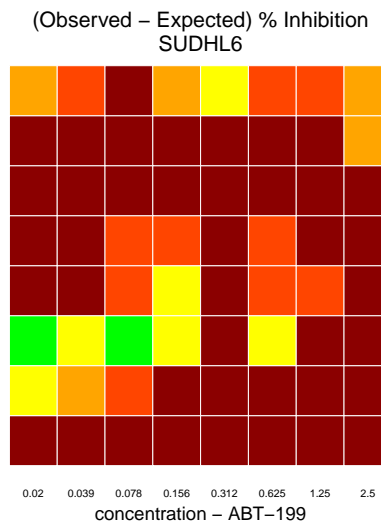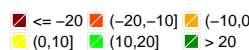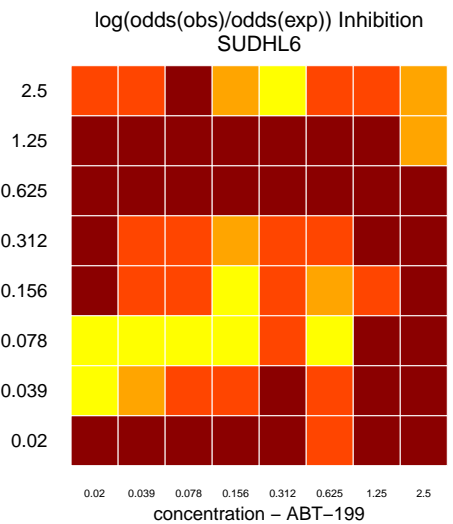

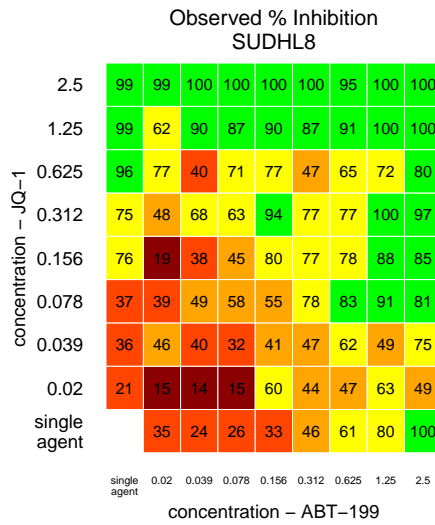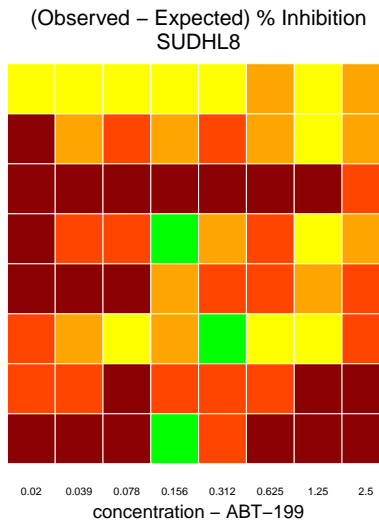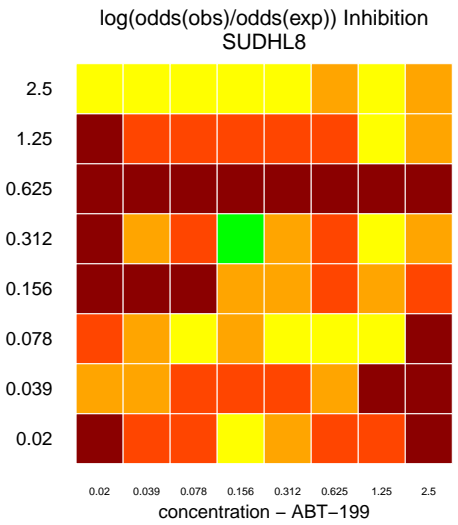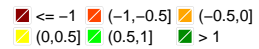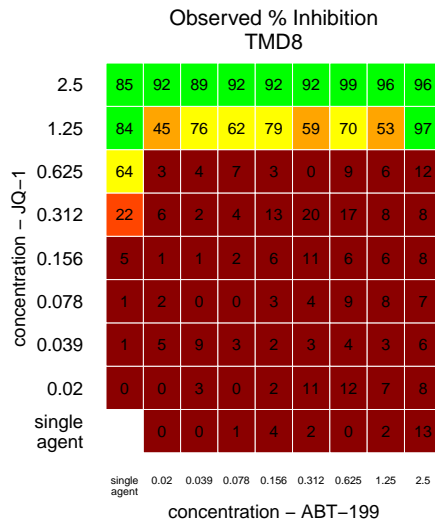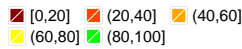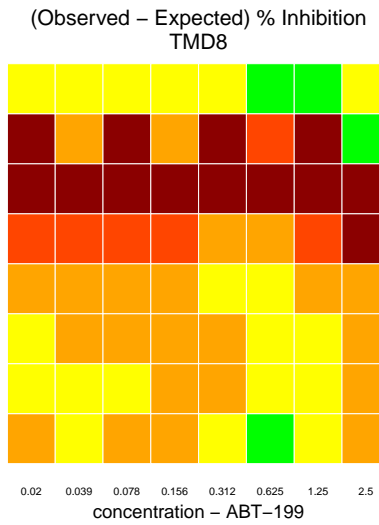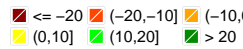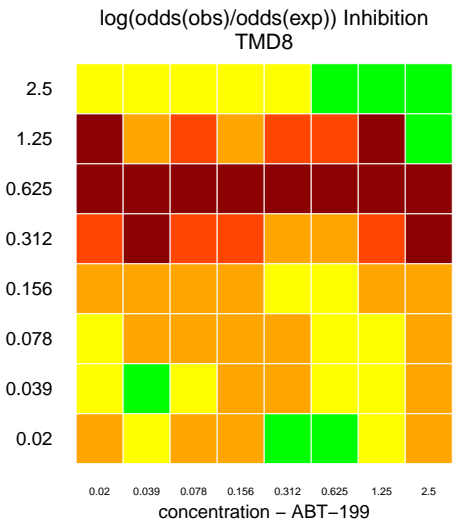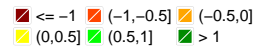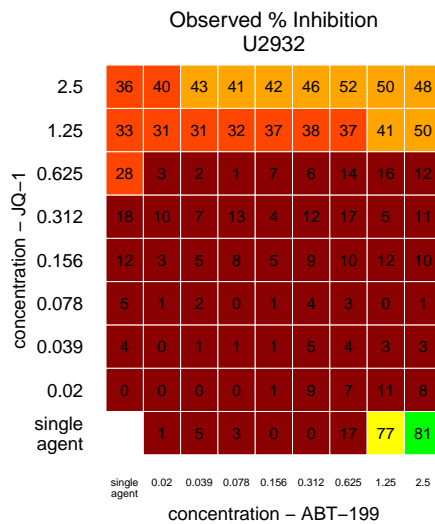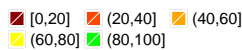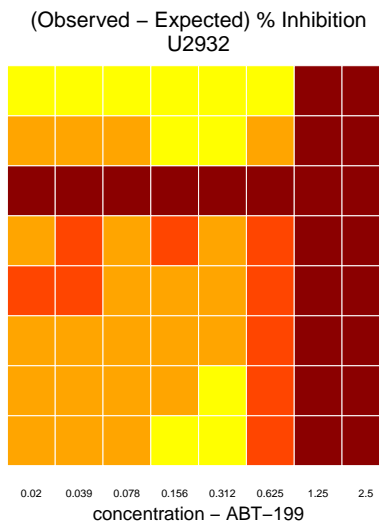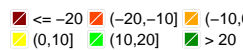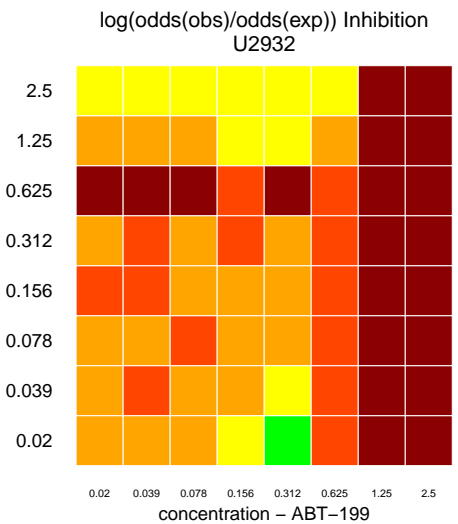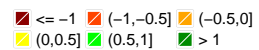



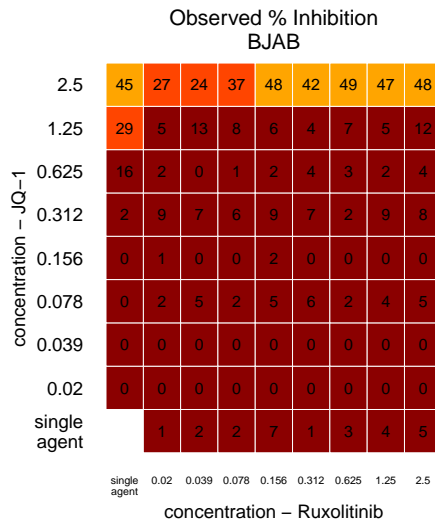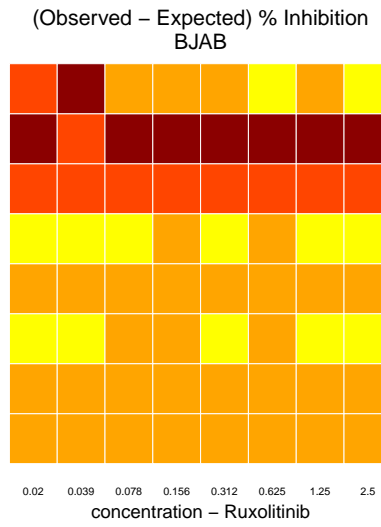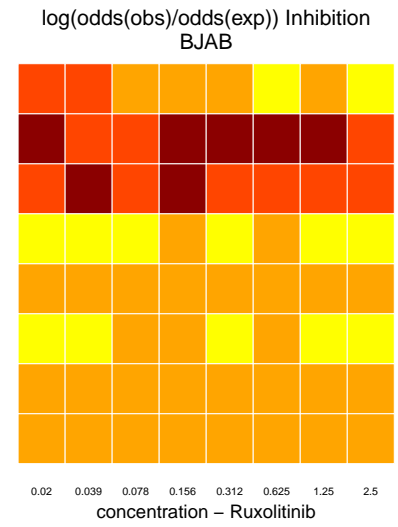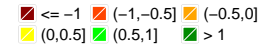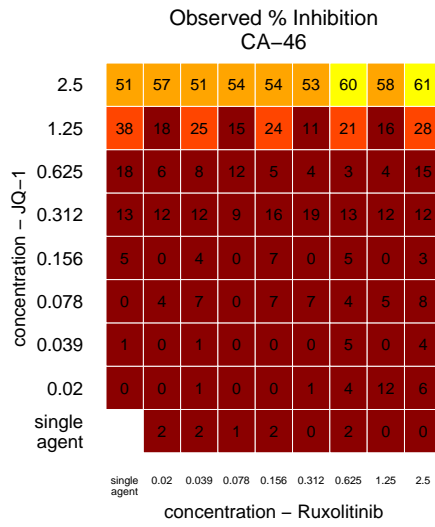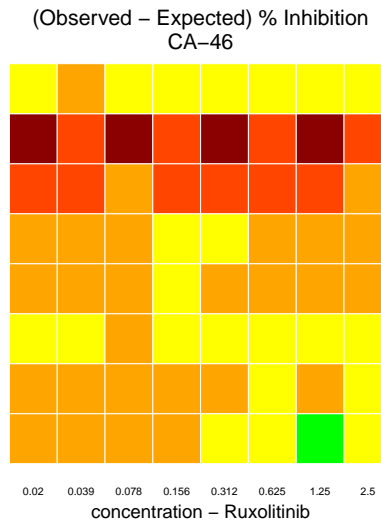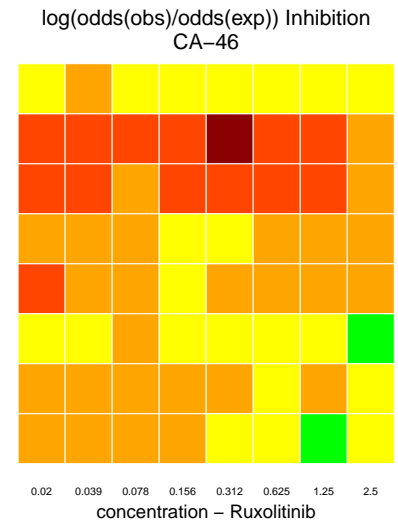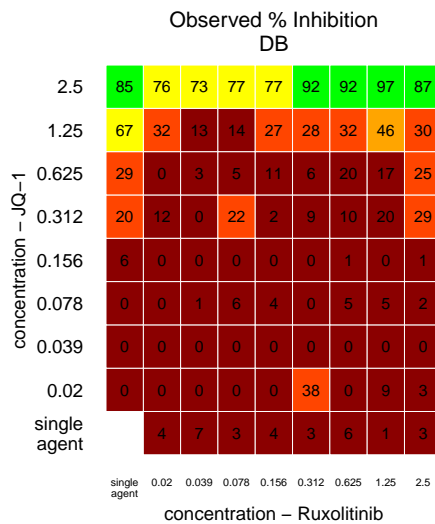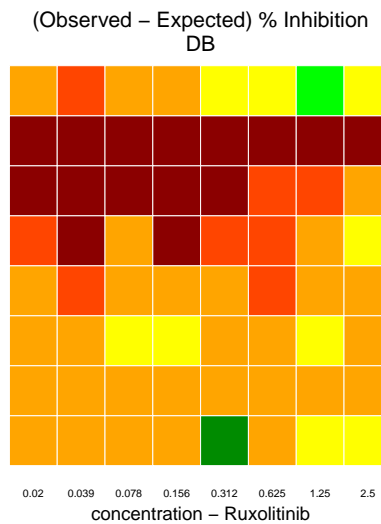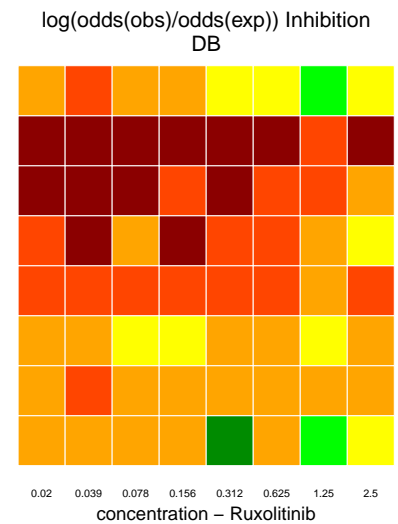

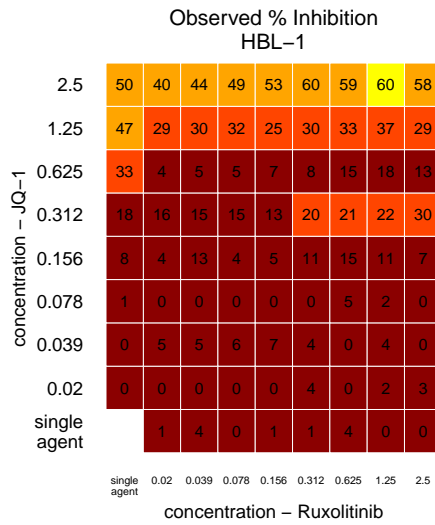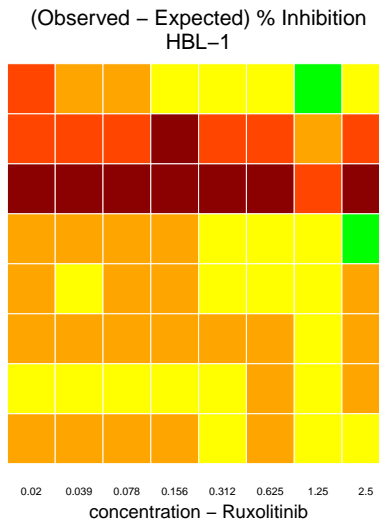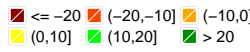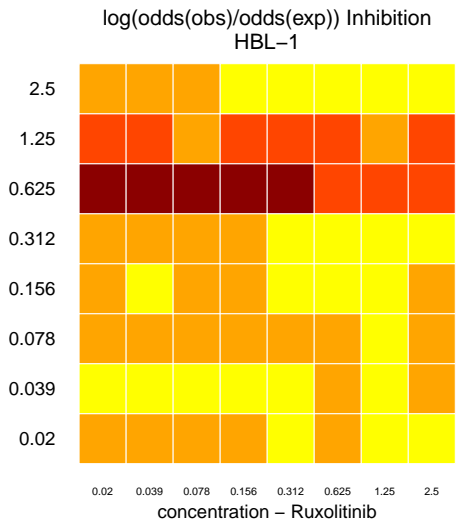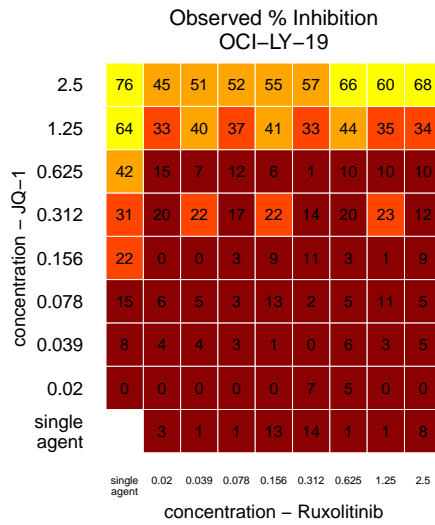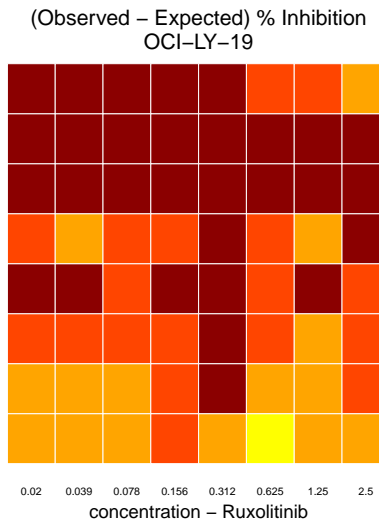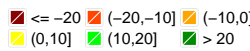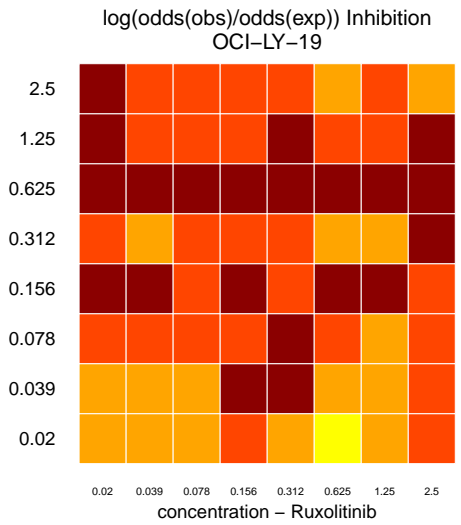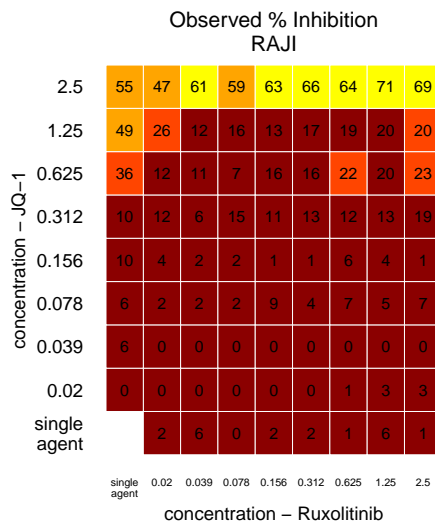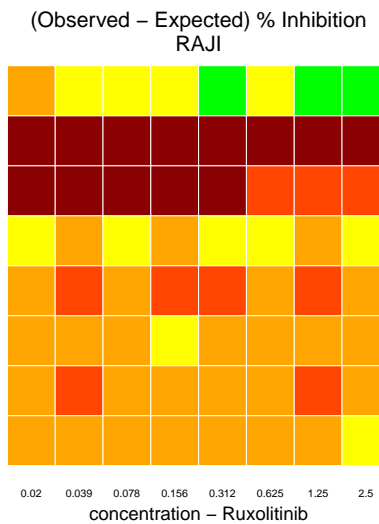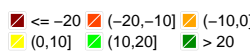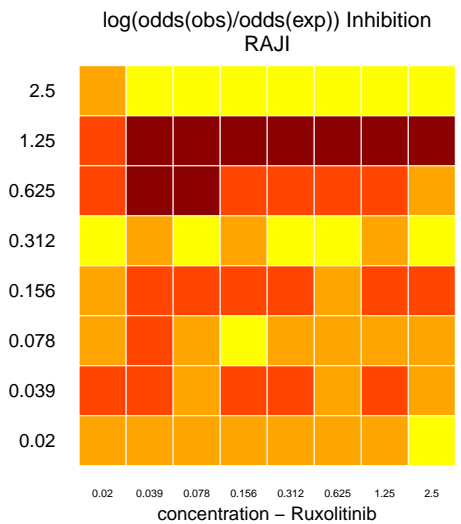

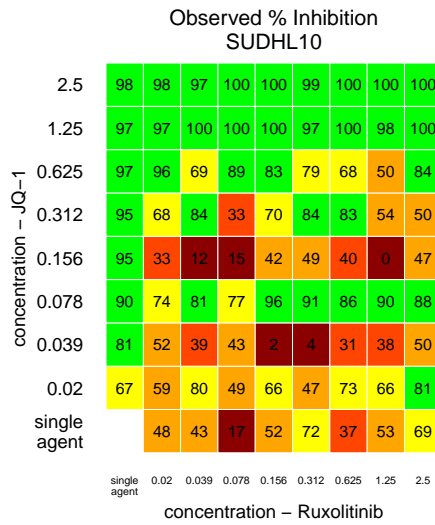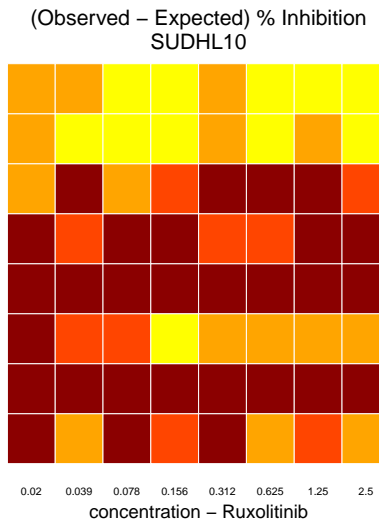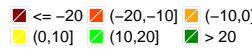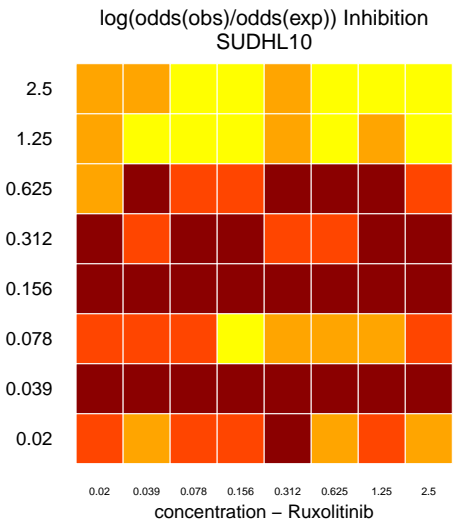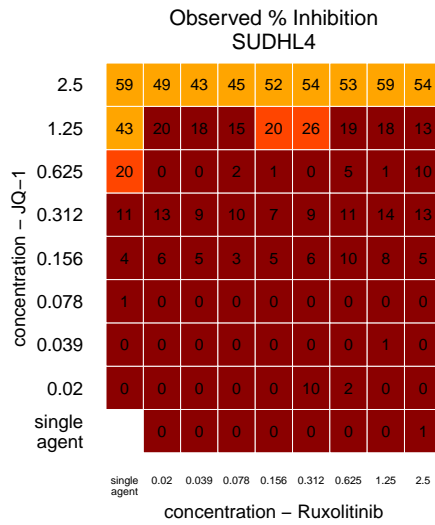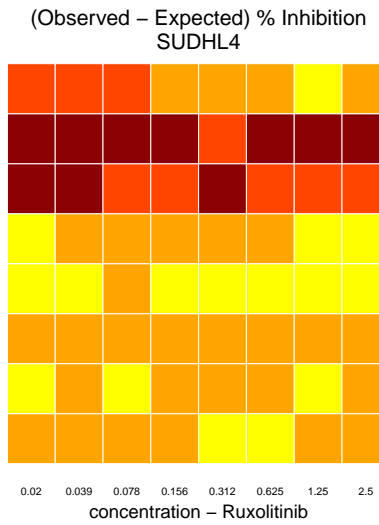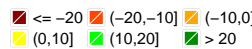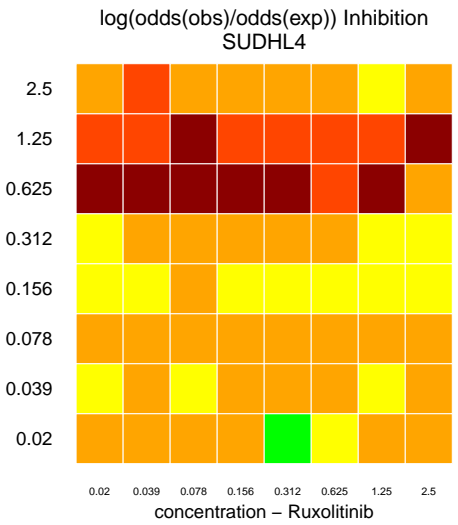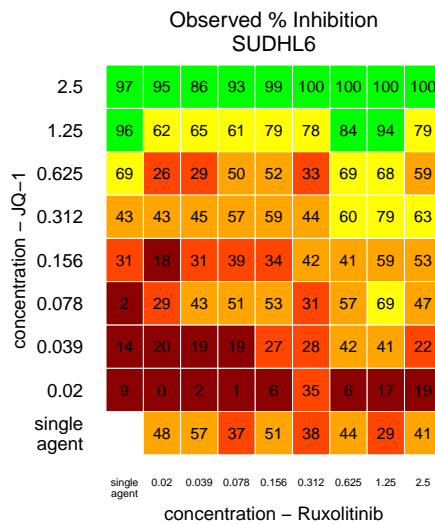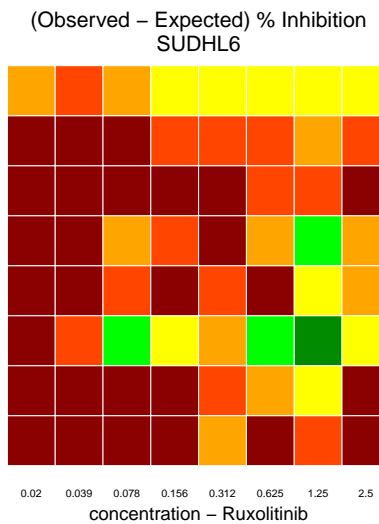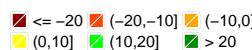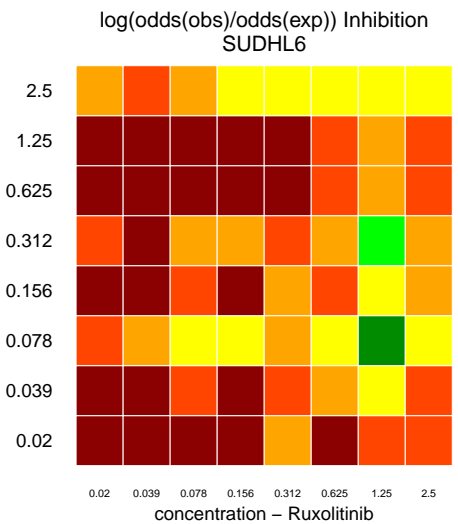

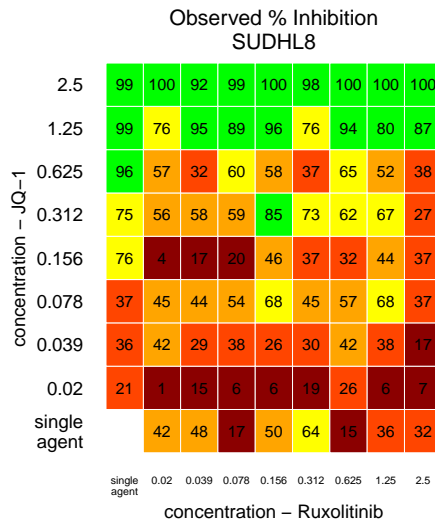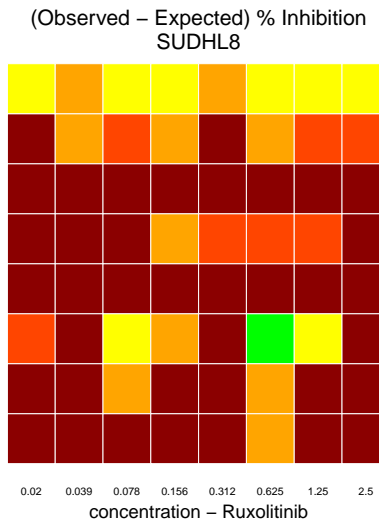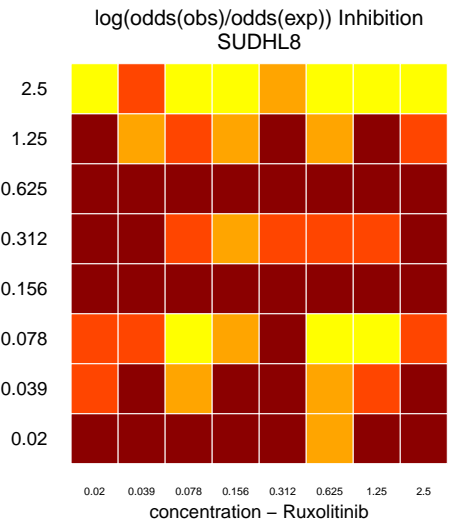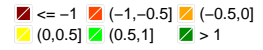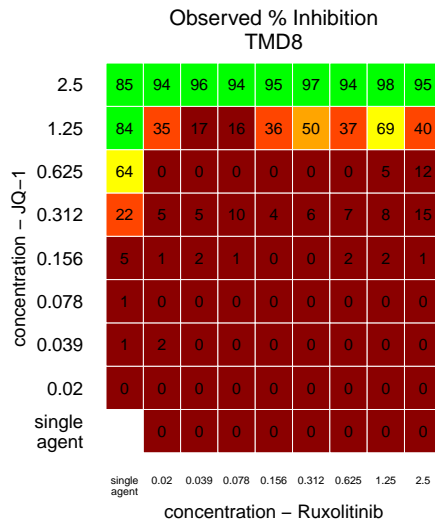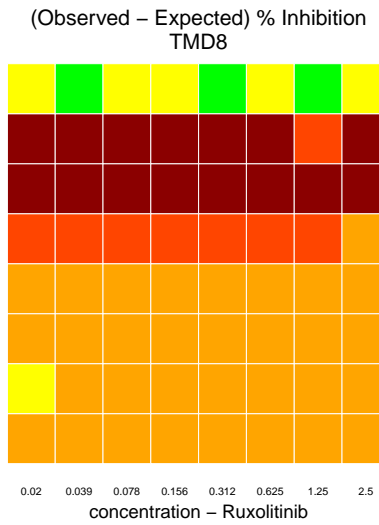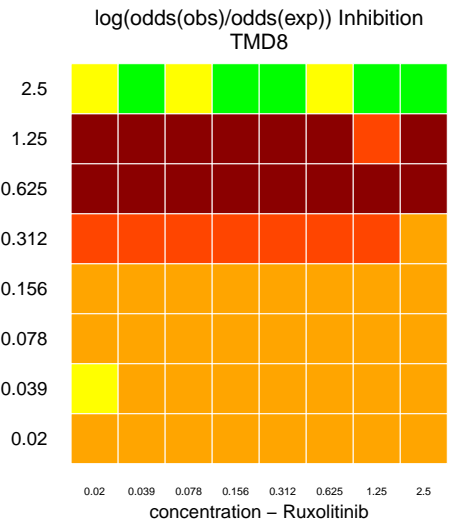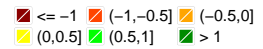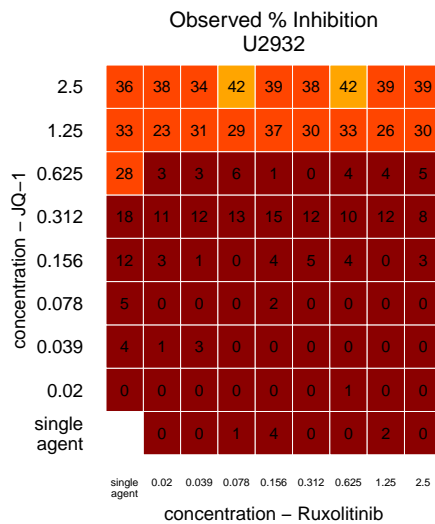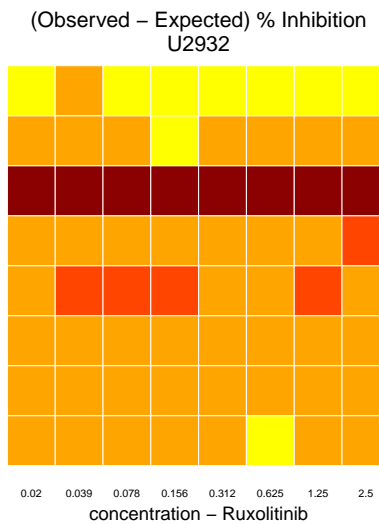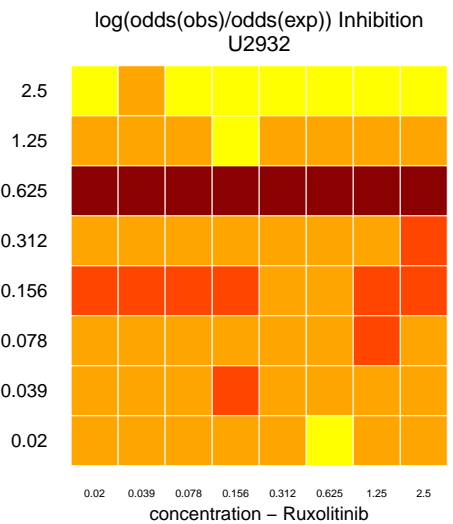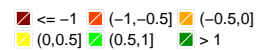

Supplement: NIHMS1051720-supplement-Data_S1.pdf [file NIHMS1051720-supplement-Data_S1.pdf]
